# Supplementary material
Source: publisher figshare collection journal article supplement (https://acs.figshare.com/ndownloader/files/26706169)
Supplement: Supplementary file 1 [file 26706169]

## Sheet: Proteomics Summary
Protein accession	Gene name	MW [kDa]	MS/MS Counts	Infected / Mock Ratio	Infected / Mock P value
A0A0D9RS89	SLC25A20	33.054	5	6.844
A0A0D9SCL0	--	15.404	24	6.4178	6.71E-03
A0A0D9RIK3	ATP5F1D	17.431	26	5.6239	3.06E-03
A0A0D9QVE3	SYT1	50.506	3	5.6076
A0A0D9RW39	HMGCS1	57.35	13	4.8763	1.30E-02
A0A0D9SD49	H1F0	20.893	24	4.4418	2.89E-04
A0A0D9R642	HKDC1	102.53	119	4.3185	1.37E-06
A0A0D9S455	VWA5A	77.454	11	4.2194	4.04E-04
A0A0D9R6N1	SLC41A3	52.488	16	4.1152	1.61E-02
A0A0D9RTJ6	CENPH	23.018	6	3.9764	2.96E-02
A0A0D9S5P1	S100A6	10.18	13	3.9341	2.83E-02
A0A0D9RRH1	FER	94.713	6	3.9096
A0A0D9RBI1	TSSC4	34.055	8	3.5384
A0A0D9R986	RAB24	23.124	7	3.4939
A0A0D9RN01	FPGS	72.169	7	3.1543
A0A0D9QUM7	BBS7	80.523	2	3.0921	3.20E-01
A0A0D9RW94	MAP3K2	69.905	3	3.0906
A0A0D9QVB7	SIRT2	43.222	8	3.0828
A0A0D9R0L8	RBX1	12.274	7	3.0393
A0A0D9QZ60	METTL7B	27.772	7	2.9879	2.23E-04
A0A0D9QVF1	PSMB10	28.941	20	2.961	1.09E-05
A0A0D9R8J6	DDAH2	29.716	13	2.8781	4.36E-02
A0A0D9RPN8	PPP1R14C	17.823	9	2.6834
A0A0D9S5J3	--	27.641	11	2.636	2.52E-02
A0A0D9RIJ2	CIRBP	18.648	21	2.6252	1.13E-03
A0A0D9S8F1	ARHGEF10L	139.89	10	2.5999	9.85E-03
A0A0D9RFU2	SIRT3	43.79	9	2.5933	1.50E-02
A0A0D9SC08	--	34.214	11	2.5165	4.17E-02
A0A0D9S0H7	ACSS1	43.883	5	2.4833
A0A0D9RSR4	IFIH1	116.6	14	2.4663	7.97E-03
A0A0D9RA97	SLC35F6	40.339	4	2.4601
A0A0D9S6T5	--	67.198	16	2.4503	1.10E-03
A0A0D9REQ1	SLC27A2	60.733	2	2.4442
A0A0D9RK25	DECR2	30.883	4	2.4437	1.76E-01
A0A0D9S944	--	19.762	11	2.4403	1.30E-03
A0A0D9S3U8	CALCOCO2	52.222	6	2.4271
A0A0D9R5R7	ITPR2	308.12	12	2.4125	2.67E-03
A0A0D9RAP2	MTFP1	18.026	6	2.4025	2.11E-01
A0A0D9RD33	SRSF3	19.308	6	2.3985	1.72E-02
A0A0D9RAD3	C3	187.05	29	2.3879	1.95E-05
A0A0D9S997	--	24.074	4	2.369
A0A0D9REV3	CAV2	18.251	25	2.3668	2.11E-05
A0A0D9R7W9	--	134.22	14	2.3308	7.57E-05
A0A0D9RE90	MTMR14	72.251	9	2.317	4.66E-02
A0A0D9R541	--	121.89	14	2.309	1.64E-04
A0A0D9R0T9	SLC11A2	62.28	6	2.3026	4.61E-03
A0A0D9RKL7	TTN	3914	6	2.2886	8.54E-02
A0A0D9QZV9	TP53I11	21.026	10	2.2637	1.42E-02
A0A0D9RLX5	STRBP	73.652	5	2.2596	1.51E-01
A0A0D9RAN5	PSMB9	23.247	21	2.2327	1.12E-02
A0A0D9S197	HSD17B2	42.742	19	2.2251	3.34E-05
A0A0D9R3F1	LDLR	84.362	9	2.2211	1.90E-02
A0A0D9RG67	ZMYM3	152.5	4	2.2084	9.49E-02
A0A0D9SE17	--	14.453	12	2.1957	4.28E-03
A0A0D9R4M4	SLC46A1	49.795	6	2.1911
A0A0D9QYR4	CELSR1	329.91	7	2.1757
A0A0D9RMV6	CHAC2	20.874	5	2.1508
A0A0D9RP86	WDR34	57.407	4	2.1434
A0A0D9RXD9	SEC11A	17.407	12	2.1407	3.84E-05
A0A0D9S5T5	--	126.37	6	2.1371	7.93E-02
A0A0D9RUR3	DAD1	12.497	18	2.1351	9.41E-04
A0A0D9RMS4	NDUFB11	25.04	11	2.1307	1.78E-02
A0A0D9RGL7	PGAP1	105.1	30	2.0676	1.92E-03
A0A0D9REU9	CAV1	20.471	24	2.0633	1.37E-02
A0A0D9RVR3	ITGA2	129.63	101	2.0595	1.02E-03
A0A0D9R0Z2	TIMM10	10.333	7	2.0561	2.05E-01
A0A0D9RSA7	TRAPPC6B	17.983	4	2.0549
A0A0D9RBA7	ITPR3	304.01	76	2.054	8.15E-06
A0A0D9QUT3	AKT2	61.368	17	2.0512	5.81E-03
A0A0D9RM17	GDAP1	41.201	14	2.0407	5.82E-02
A0A0D9REY3	ANP32B	28.801	25	2.036	7.06E-02
A0A0D9QV58	ACSS3	74.757	45	2.0306	3.18E-03
A0A0D9R3T5	METTL9	36.602	16	2.0241	1.51E-03
A0A0D9RJI9	--	24.67	195	2.0205	4.57E-04
A0A0D9S329	DHDH	36.374	10	2.0129	5.97E-03
A0A0D9RXR3	CLPTM1L	64.986	13	2.0103	9.61E-04
A0A0D9R4N3	RPP40	41.739	4	2.0068
A0A0D9SB66	--	16.363	7	1.9959
A0A0D9RSC4	TATDN3	30.224	6	1.9902
A0A0D9QYU3	LIN7C	21.834	14	1.9888	8.93E-02
A0A0D9RLQ8	ECHDC3	32.76	27	1.984	7.28E-04
A0A0D9RJ09	SLC25A40	38.168	9	1.9794
A0A0D9S4Y4	CYBC1	20.76	13	1.9627	3.84E-03
A0A0D9RP34	CYB5R1	34.104	19	1.9623	1.98E-03
A0A0D9R0A8	VKORC1	18.169	7	1.9444	5.51E-02
A0A0D9R899	SEC61A1	46.044	23	1.9415	5.89E-04
A0A0D9RYS8	NUDT15	18.79	6	1.9364	5.32E-02
A0A0D9RKL4	PRAF2	19.284	10	1.9313	1.26E-01
A0A0D9R947	PLGRKT	17.18	6	1.897
A0A0D9R6J6	SIPA1	111.97	4	1.8955	2.28E-01
A0A0D9R1D5	--	46.33	20	1.8828	4.93E-05
A0A0D9QXI6	GRK5	67.868	3	1.8738
A0A0D9R6X7	SSBP1	17.277	43	1.8736	7.31E-03
A0A0D9RB07	NUDT14	22.979	11	1.873	2.92E-02
A0A0D9RPM2	PRRC1	46.712	11	1.8709	1.81E-01
A0A0D9S2T7	KDELR1	24.542	11	1.8641	5.69E-03
A0A0D9RF90	--	141.61	5	1.862	2.44E-01
A0A0D9RYK8	FSCN1	54.513	72	1.8565	7.63E-05
A0A0D9R7D6	NRM	29.347	14	1.8484	1.64E-01
A0A0D9S3N5	SCRN2	46.517	21	1.8409	3.35E-02
A0A0D9R0D7	FARP2	119.87	15	1.8393	2.41E-03
A0A0D9RWL1	CTSB	37.774	56	1.838	5.48E-04
A0A0D9RYW8	ARPC1B	41.569	14	1.8375	6.41E-03
A0A0D9S0F9	LAMP2	44.842	14	1.8321	6.53E-04
A0A0D9S191	LSM6	9.1275	4	1.8222	2.16E-02
A0A0D9QW70	TRIM21	54.354	15	1.8214	4.15E-03
A0A0D9S0Y8	APAF1	142.02	11	1.8163	1.05E-02
A0A0D9R4N4	GSTK1	25.515	46	1.8159	1.16E-03
A0A0D9RI88	--	25.353	6	1.8122
A0A0D9RML6	SRC	70.729	6	1.8117	1.15E-02
A0A0D9RGI4	SLC30A6	51.156	4	1.807	2.53E-01
A0A0D9RZ35	LAMTOR4	10.722	10	1.8058	3.64E-03
A0A0D9RRF1	--	37.852	41	1.8054	1.45E-04
A0A0D9R414	TPK1	27.298	10	1.8016	9.36E-02
A0A0D9REB3	--	60.731	34	1.7993	1.22E-05
A0A0D9RRC2	ANXA4	35.992	123	1.799	1.76E-04
A0A0D9RBZ6	ITSN1	187.78	11	1.798	4.92E-03
A0A0D9R2S3	--	49.463	14	1.7968	8.68E-03
A0A0D9QYQ6	ADD3	79.228	48	1.7947	1.38E-05
A0A0D9R785	ATG9A	94.508	6	1.7908	8.12E-02
A0A0D9RQJ5	AQP1	28.556	30	1.7903	3.50E-02
A0A0D9S268	DHX58	76.792	6	1.7882
A0A0D9R6I6	GOLT1B	15.425	10	1.783	4.80E-01
A0A0D9R6T6	C11orf68	31.554	6	1.7785	1.79E-01
A0A0D9SA63	--	14.501	10	1.7764	6.74E-02
A0A0D9RZY5	NEDD4L	113.97	3	1.7624
A0A0D9RL76	HDAC6	131.34	11	1.7596	2.18E-03
A0A0D9RWR4	HEBP2	22.918	12	1.7595	1.06E-01
A0A0D9QYJ7	ALG12	49.345	15	1.7562	1.24E-03
A0A0D9QZH3	SPATA20	88.141	24	1.7546	5.48E-03
A0A0D9R3S9	SLC44A2	73.139	17	1.7532	7.08E-03
A0A0D9RKT0	SRSF5	31.263	28	1.7523	4.52E-03
A0A0D9RJH6	--	39.65	35	1.7398	1.03E-03
A0A0D9R901	TCIRG1	92.574	34	1.7389	4.02E-04
A0A0D9QZU4	--	21.747	13	1.738	2.79E-03
A0A0D9RBA3	PODXL	56.491	7	1.7319	1.45E-02
A0A0D9RQY1	TMEM167A	8.0598	6	1.7305
A0A0D9RTL9	--	41.514	11	1.728	2.27E-01
A0A0D9RNP1	ARL8A	21.416	40	1.7272	7.01E-03
A0A0D9RE46	WDR43	55.653	28	1.7246	2.18E-02
A0A0D9RT04	ARSD	60.51	11	1.7212	5.24E-03
A0A0D9RQY7	PSMA4	29.483	41	1.72	9.06E-03
A0A0D9RIE1	STAT1	87.376	236	1.7189	5.03E-05
A0A0D9QZK1	ABCC3	169.32	100	1.7143	1.78E-05
A0A0D9REI8	NDUFB3	11.339	2	1.7126	2.59E-01
A0A0D9RWG9	WDR19	151.64	43	1.7122	1.94E-02
A0A0D9RDP3	NUDT16	21.161	20	1.7121	5.74E-04
A0A0D9RCM8	LPCAT3	55.975	10	1.7117	3.83E-02
A0A0D9RGV9	DSTN	18.506	27	1.7084	5.07E-04
A0A0D9REE9	TMCO1	21.175	13	1.7081	3.10E-02
A0A0D9S3Q7	CBX1	29.677	37	1.7074	4.89E-04
A0A0D9QX80	SCARB2	54.33	56	1.7061	1.70E-03
A0A0D9S1E3	ARL1	20.417	18	1.7048	5.54E-03
A0A0D9RIY3	CPQ	51.919	44	1.7016	1.26E-03
A0A0D9RNL0	WDR37	54.775	21	1.6984	9.00E-03
A0A0D9R2F8	TEFM	41.75	5	1.6885
A0A0D9R456	TCAF1	102.05	21	1.6874	5.10E-03
A0A0D9R4Y0	PARP9	92.276	15	1.6835	3.64E-03
A0A0D9RM30	--	82.565	11	1.6793	9.23E-03
A0A0D9R9T9	PECR	32.306	26	1.6706	5.93E-03
A0A0D9RJZ8	BCL2L1	26.107	13	1.6668	2.98E-03
A0A0D9RQZ2	DPY19L1	70.634	30	1.6654	9.40E-04
A0A0D9RSY6	TMED4	26.098	19	1.6629	1.65E-01
A0A0D9S9P1	--	41.194	12	1.6593	3.08E-01
A0A0D9RKJ8	PON2	39.284	46	1.655	1.67E-04
A0A0D9RRK2	PCYOX1	56.529	74	1.6547	1.72E-04
A0A0D9R6G9	--	11.131	23	1.6535	4.41E-03
A0A0D9RAM5	TAP1	86.402	15	1.6526	4.89E-04
A0A0D9S3E6	VPS29	13.225	33	1.6519	6.27E-02
A0A0D9R6F0	AGPAT3	43.399	6	1.6507	5.29E-04
A0A0D9RPI5	--	88.968	10	1.6502	3.73E-02
A0A0D9RW15	NNT	113.85	76	1.6501	3.57E-05
A0A0D9S3F1	TRPM4	134.71	11	1.6479	1.71E-03
A0A0D9RFU4	NIPSNAP3A	28.474	44	1.6462	3.84E-04
A0A0D9QZQ5	HSD17B12	34.528	41	1.6438	1.37E-04
A0A0D9RIC7	PTGR1	30.215	22	1.6404	1.19E-02
A0A0D9S1T8	CAVIN1	51.586	54	1.6397	2.30E-04
A0A0D9RU31	DPYSL2	62.293	118	1.6388	2.16E-05
A0A0D9RRW7	ARSB	59.813	8	1.638	1.92E-03
A0A0D9RG51	PLSCR1	34.399	14	1.6369	1.88E-03
A0A0D9S788	CZIB	18.077	13	1.6344	7.16E-02
A0A0D9RPE6	PCYT1B	41.968	15	1.6342	2.94E-02
A0A0D9R6G0	KCNJ8	47.967	6	1.6312	7.38E-02
A0A0D9RNZ3	PLCD1	85.734	50	1.6303	1.24E-03
A0A0D9R1C9	MVP	99.488	190	1.6297	3.00E-05
A0A0D9S546	ATP6V0A2	98.254	8	1.6296	8.96E-02
A0A0D9RTX1	EPHX2	62.578	10	1.6281	2.77E-02
A0A0D9QYX5	YTHDC1	84.853	6	1.627	9.80E-02
A0A0D9RB93	STK10	87.914	13	1.6266	2.12E-03
A0A0D9QWQ2	ST5	126.59	28	1.6263	4.40E-02
A0A0D9S7L0	PPCS	34.006	9	1.6259	1.26E-01
A0A0D9RM16	MTRF1L	43.364	7	1.6247	1.70E-02
A0A0D9REB6	ECI1	33.056	23	1.6215	1.99E-03
A0A0D9RJB1	ISCA2	16.486	10	1.6211	2.73E-01
A0A0D9RQG6	--	15.665	12	1.6181	4.41E-02
A0A0D9RCE1	IDH1	46.669	62	1.6153	1.92E-04
A0A0D9RSY5	DPP4	87.912	82	1.6135	8.99E-05
A0A0D9SBM8	MOCS3	49.741	15	1.6122	1.54E-02
A0A0D9R4D7	LSS	74.04	71	1.6121	2.08E-05
A0A0D9RSL2	DGUOK	32.121	19	1.6092	4.53E-04
A0A0D9RVW3	TEP1	290.41	29	1.5985	3.27E-02
A0A0D9QWU1	UROS	33.505	5	1.5897	3.64E-01
A0A0D9R4C9	SDF2	23.113	25	1.5875	9.49E-05
A0A0D9S626	WARS2	40.097	18	1.5846	1.26E-01
A0A0D9QV98	GAR1	20.751	22	1.5836	1.28E-03
A0A0D9RZS5	PSPC1	30.486	13	1.583	3.24E-01
A0A0D9R2D5	ARHGAP17	81.769	13	1.5815	1.37E-01
A0A0D9S8E6	ALDH4A1	46.834	22	1.5808	2.16E-02
A0A0D9RBW2	SNX17	52.915	33	1.5797	7.24E-03
A0A0D9S941	--	21.661	3	1.5771
A0A0D9RLJ0	STOM	31.615	59	1.5743	6.58E-05
A0A0D9R574	ITGB2	87.123	46	1.5729	9.34E-04
A0A0D9QV26	FHOD1	125.47	39	1.5718	1.56E-03
A0A0D9QVZ4	FOLR1	29.681	21	1.5716	7.88E-03
A0A0D9R8U5	XXYLT1	43.84	8	1.5691	1.25E-02
A0A0D9RED5	MGST3	16.494	18	1.5677	3.52E-02
A0A0D9R068	ACP2	48.352	25	1.567	1.41E-03
A0A0D9RL88	CDC23	68.806	33	1.5638	3.06E-06
A0A0D9R6S3	NDUFV3	44.871	35	1.5614	1.04E-03
A0A0D9RJI2	ALDH6A1	49.515	43	1.5607	6.02E-04
A0A0D9RRD6	TMEM189-UBE2V1	42.035	17	1.5576	1.09E-01
A0A0D9RDB8	MTCH1	41.57	12	1.5575	4.04E-02
A0A0D9RAN4	TMEM43	44.844	93	1.5563	8.73E-05
A0A0D9QWD2	HSD17B11	32.954	25	1.5553	7.57E-03
A0A0D9QYJ1	SRSF2	25.476	26	1.5529	1.08E-01
A0A0D9S7R6	SNIP1	45.845	8	1.5529	3.64E-01
A0A0D9RJC6	INTS8	113.04	10	1.5524
A0A0D9SAS3	SLC18A3	57.007	9	1.5522	1.14E-01
A0A0D9RZ95	AGFG2	50.207	8	1.547	1.64E-01
A0A0D9RYA8	RAB12	36.831	10	1.5469	1.04E-01
A0A0D9RQK3	--	16.477	17	1.5456	4.73E-03
A0A0D9S787	MAGOH	17.163	40	1.5455	7.81E-04
A0A0D9RRU6	SURF4	30.38	29	1.5441	1.98E-02
A0A0D9RSR7	NPEPL1	55.851	20	1.5441	3.80E-02
A0A0D9RV06	EEF1A2	50.47	76	1.5429	5.99E-03
A0A0D9RWT1	NADK2	34.208	15	1.5373	2.77E-02
A0A0D9R333	ABCB8	78.141	31	1.537	3.06E-04
A0A0D9RG92	SYPL1	28.615	21	1.5367	5.20E-04
A0A0D9RXY1	LAMP1	44.744	16	1.5352	9.37E-04
A0A0D9QVH9	CSRP2	20.954	15	1.5312	7.21E-03
A0A0D9RKN3	GNB4	37.567	5	1.531	3.94E-01
A0A0D9RIB0	DPYSL3	74.085	233	1.5306	1.78E-05
A0A0D9RUR2	EPHX1	53.002	47	1.5296	3.83E-05
A0A0D9RK05	RSU1	31.51	28	1.5284	5.23E-02
A0A0D9RPA4	ERAP1	103.29	81	1.5236	3.88E-04
A0A0D9R5J9	TST	33.425	58	1.5235	6.08E-03
A0A0D9RP01	DHRS7	38.174	28	1.522	2.71E-02
A0A0D9RSE1	BLVRA	33.432	64	1.5214	1.45E-04
A0A0D9QZ15	TTC38	53.19	53	1.5213	2.12E-04
A0A0D9RND5	EHHADH	79.354	72	1.5205	4.02E-03
A0A0D9RG57	MPDU1	26.725	10	1.5197
A0A0D9S100	ELMOD2	34.953	12	1.518	1.50E-02
A0A0D9RKI6	SLC25A11	34.121	72	1.5174	3.01E-04
A0A0D9RS70	IQGAP2	180.44	44	1.514	5.24E-04
A0A0D9R2Z9	MPP1	47.259	17	1.5115	1.85E-04
A0A0D9RV03	PLPP1	32.104	11	1.5106	1.71E-02
A0A0D9S7N0	ZMPSTE24	54.792	39	1.5102	1.68E-03
A0A0D9R6T8	DRAP1	22.39	4	1.5096
A0A0D9RXZ6	ATP11A	129.78	6	1.5083
A0A0D9RJZ2	PDP1	67.461	41	1.5082	7.32E-03
A0A0D9S5R0	--	21.716	17	1.5078	3.96E-02
A0A0D9R5M2	STK38L	54.561	13	1.5059	1.31E-03
A0A0D9RNF0	LYRM7	11.951	7	1.5038	2.38E-02
A0A0D9RR93	TMED3	24.898	13	1.5032	1.74E-03
A0A0D9R161	DHRS11	28.364	22	1.5029	7.47E-02
A0A0D9RZX7	FECH	47.796	41	1.5012	6.15E-04
A0A0D9S5J9	MBOAT7	38.751	15	1.5	3.66E-02
A0A0D9RBS9	RAB5A	23.658	24	1.4992	4.64E-02
A0A0D9R8Q2	HADHA	83.079	151	1.4981	2.76E-03
A0A0D9QXL3	CFAP20	22.774	21	1.4976	6.41E-02
A0A0D9RLC7	--	26.415	22	1.4934	4.82E-05
A0A0D9RVX3	ANO10	76.26	42	1.4912	1.24E-04
A0A0D9S1G3	BECN1	51.908	6	1.4903
A0A0D9RY09	CARKD	35.257	10	1.49	7.29E-03
A0A0D9R9F3	IL1RAP	65.365	4	1.4899
A0A0D9RDY8	TAPBPL	50.191	28	1.4895	8.66E-04
A0A0D9RSH1	IDUA	72.962	12	1.489	2.69E-03
A0A0D9R0W8	METTL7A	28.249	22	1.4884	9.72E-04
A0A0D9RX28	GNPDA2	31.098	23	1.4884	2.47E-03
A0A0D9RY11	COL4A2	165.76	39	1.4874	5.11E-03
A0A0D9RBH6	ADSSL1	50.222	31	1.487	1.73E-03
A0A0D9R4K5	SYK	72.083	20	1.486	9.52E-03
A0A0D9RLT4	NISCH	138.34	16	1.486	1.62E-01
A0A0D9RGI6	CLTCL1	217.21	58	1.4842	2.56E-04
A0A0D9QXQ0	SHTN1	71.692	30	1.484	1.72E-03
A0A0D9RG87	--	10.946	87	1.4839	1.34E-02
A0A0D9RAL8	PSMB8	34.096	29	1.4831	1.19E-03
A0A0D9RCK1	COA6	14.187	13	1.4818	3.82E-01
A0A0D9S4F1	STT3A	80.529	46	1.4803	3.38E-03
A0A0D9R2Z2	RPP30	29.378	27	1.4792	1.88E-01
A0A0D9S8L8	AGTRAP	17.337	15	1.4764	1.71E-03
A0A0D9S142	--	32.608	13	1.4761	5.16E-03
A0A0D9RQ41	PCIF1	80.627	19	1.4755	1.82E-02
A0A0D9RD11	BABAM2	47.002	8	1.4745	4.11E-03
A0A0D9RPG9	ATP2B4	129.36	11	1.4724	8.10E-04
A0A0D9QXN6	NUDT19	41.832	11	1.4712	1.14E-02
A0A0D9S3U2	NLRX1	107.12	78	1.4707	2.10E-03
A0A0D9S504	FN3KRP	34.447	23	1.4692	1.42E-03
A0A0D9RBU9	LANCL1	45.253	48	1.4687	8.33E-05
A0A0D9S6I5	GSTM4	25.572	12	1.4681	2.70E-01
A0A0D9RYJ8	VPS36	43.802	14	1.4651	5.51E-03
A0A0D9SC49	--	48.137	128	1.4639	1.95E-04
A0A0D9SCT7	--	11.315	16	1.4614	6.74E-03
A0A0D9R6B8	--	27.996	35	1.4612	4.54E-05
A0A0D9RKU1	NDUFB5	21.716	6	1.4592	3.74E-02
A0A0D9R434	FLOT2	47.064	68	1.4589	1.99E-02
A0A0D9RI35	TOR3A	46.944	5	1.4574
A0A0D9S8C1	DDOST	48.829	92	1.4572	1.95E-04
A0A0D9RKW7	FAM234A	60.161	60	1.4556	3.11E-03
A0A0D9RMB1	--	51.909	12	1.4535	1.94E-01
A0A0D9RP81	ERAP2	110.4	24	1.4534	4.24E-03
A0A0D9RMK1	AFF4	127.55	10	1.4527
A0A0D9R355	ANO6	106.16	19	1.4517	4.63E-02
A0A0D9RK62	NCEH1	45.879	54	1.4517	2.10E-04
A0A0D9R6X1	HS1BP3	42.93	34	1.4498	6.96E-03
A0A0D9S4B2	GAA	105.41	80	1.4498	6.45E-04
A0A0D9RAN2	PRXL2A	24.429	16	1.4485	1.98E-02
A0A0D9RM74	LMBRD1	61.486	10	1.4469	2.56E-02
A0A0D9RNP7	PML	89.91	59	1.4455	1.22E-05
A0A0D9S6Y9	ACADM	46.624	40	1.4434	7.66E-04
A0A0D9RCP4	PHB2	31.724	81	1.4425	1.06E-04
A0A0D9RG75	MRPS10	23.022	23	1.4425	1.08E-01
A0A0D9RP68	SPTAN1	285.2	690	1.4424	4.96E-05
A0A0D9SC07	EPM2AIP1	70.202	55	1.4408	7.49E-04
A0A0D9RY59	FARP1	118.45	90	1.4407	2.05E-04
A0A0D9RPZ6	UBA7	111.52	35	1.4383	2.02E-02
A0A0D9RFW6	TNIP1	71.977	13	1.436	1.22E-02
A0A0D9RKC1	DECR1	36.029	50	1.4357	1.35E-02
A0A0D9S1C4	IFI35	31.678	20	1.4352	2.37E-03
A0A0D9S2K8	TLR3	103.49	25	1.4315	4.06E-02
A0A0D9R9V3	WDR91	83.377	27	1.4305	2.50E-03
A0A0D9RB50	TRAPPC9	96.058	5	1.4298	1.55E-01
A0A0D9RGA9	SCYL3	82.908	11	1.4293	2.96E-01
A0A0D9RQJ1	COMMD10	21.336	20	1.4277	2.50E-02
A0A0D9SE21	PRPS1L1	34.777	9	1.4255	1.73E-02
A0A0D9QUP5	PRCP	55.777	31	1.4241	1.72E-03
A0A0D9RWL0	IGF1R	120.93	11	1.4217	2.86E-02
A0A0D9RLE6	VTI1B	26.713	8	1.4208	1.40E-02
A0A0D9RX20	IDH2	50.883	127	1.4197	1.72E-03
A0A0D9RWJ1	DAB2	82.454	19	1.4195	1.20E-02
A0A0D9RY36	PCCA	79.924	41	1.4194	2.05E-05
A0A0D9S7S1	MRPS15	29.263	15	1.4182	2.46E-01
A0A0D9R6F4	ABCC9	174.32	21	1.4178	3.92E-02
A0A0D9S6Y3	PIGK	45.224	11	1.4163	2.05E-02
A0A0D9RWK8	FDFT1	48.159	8	1.416	2.06E-01
A0A0D9RI32	RRAGB	43.28	7	1.415
A0A0D9RBC2	NIPSNAP1	33.246	28	1.4148	1.19E-03
A0A0D9QX76	STBD1	39.002	31	1.4144	1.14E-02
A0A0D9RQ91	TOR1A	40.784	21	1.4105	4.48E-03
A0A0D9RYI9	SNRPD1	13.281	33	1.4091	6.07E-03
A0A0D9RR92	VDAC3	30.783	82	1.4089	3.30E-04
A0A0D9QV50	CAPN5	73.24	25	1.408	5.90E-03
A0A0D9RPR6	XYLB	58.314	25	1.4072	8.93E-03
A0A0D9QXR3	HSPA12A	77.045	15	1.4067	8.81E-02
A0A0D9S8P8	TMEM201	72.41	22	1.4054	8.93E-04
A0A0D9QXK1	--	16.142	36	1.4039	1.19E-01
A0A0D9R3L0	CARM1	66.107	39	1.4036	2.41E-04
A0A0D9QVW6	CYB5B	16.76	38	1.4028	5.68E-04
A0A0D9R478	--	14.846	19	1.4028	1.22E-02
A0A0D9QUX3	NARS2	47.644	16	1.4017	2.95E-02
A0A0D9R9G7	VCL	123.89	249	1.4005	9.43E-06
A0A0D9R9I3	NUDT16L1	24.628	19	1.4001	7.39E-02
A0A0D9RJE3	ENPP4	51.566	16	1.3998	2.38E-02
A0A0D9S9J1	HDHD3	28.216	28	1.399	5.68E-03
A0A0D9QYE2	ATP13A1	108.65	57	1.3981	2.16E-02
A0A0D9R6D5	CMAS	48.437	60	1.3975	2.22E-03
A0A0D9RZI5	PARP4	191.66	53	1.3974	5.64E-04
A0A0D9S0U5	PGRMC2	26.156	20	1.3974	3.02E-02
A0A0D9S6Q8	FNBP1L	63.544	9	1.3959	1.22E-01
A0A0D9SDH7	ARF6	20.082	36	1.3946	1.10E-03
A0A0D9R9R9	VDAC2	27.492	107	1.3944	3.96E-04
A0A0D9RAK2	SLC6A6	69.799	8	1.3944	2.41E-02
A0A0D9RD81	CYP20A1	52.407	54	1.3929	2.62E-03
A0A0D9RIZ7	GNPDA1	32.68	54	1.3927	2.34E-04
A0A0D9R8J9	CBR3	30.846	13	1.3926	1.58E-03
A0A0D9R3Z0	PIPOX	44.195	10	1.3912	3.60E-01
A0A0D9RNL2	RNPEP	72.539	87	1.3904	3.65E-04
A0A0D9S4H1	RAB35	23.025	21	1.3904	4.69E-02
A0A0D9R7B7	RETREG2	57.861	12	1.3901	3.80E-02
A0A0D9RJC3	WDR18	47.45	40	1.3896	6.74E-04
A0A0D9S470	SIAE	58.441	21	1.3892	5.78E-03
A0A0D9RG31	SAT2	16.802	5	1.3889	1.06E-01
A0A0D9SAH6	GSPT2	68.975	9	1.3881
A0A0D9S488	LGALS3BP	65.011	22	1.3874	4.26E-02
A0A0D9RMJ8	RPN2	69.314	132	1.3857	1.95E-03
A0A0D9S2C2	PRKD2	96.653	7	1.3857
A0A0D9QXX9	ABLIM1	95.881	39	1.3849	1.05E-02
A0A0D9RE73	CLTA	23.69	21	1.3848	2.18E-02
A0A0D9S1H2	VPS25	20.747	15	1.3848	8.99E-02
A0A0D9QXQ7	LLGL2	113.61	16	1.384	1.25E-02
A0A0D9QXA5	TK2	30.689	3	1.3839	1.88E-01
A0A0D9RY12	COL4A1	160.45	18	1.3831	1.98E-03
A0A0D9S1S7	NAGLU	65.656	57	1.3825	6.92E-05
A0A0D9QZ71	ISYNA1	61.009	34	1.3807	2.70E-02
A0A0D9R6J5	RECQL	73.271	70	1.3802	5.42E-04
A0A0D9R4I7	PIGS	61.108	25	1.3799	1.74E-02
A0A0D9RGT0	PDZD11	16.131	9	1.3794
A0A0D9RYT2	SUCLA2	29.696	14	1.3794	8.62E-02
A0A0D9S404	CADM3	46.895	10	1.3792	1.78E-01
A0A0D9S566	ETFB	27.815	86	1.3785	2.08E-03
A0A0D9R3I7	COX8A	7.676	16	1.3784	7.79E-01
A0A0D9R6Z7	LDAH	37.409	11	1.3783	2.60E-02
A0A0D9R508	C19orf66	33.11	7	1.378
A0A0D9QXM7	CHKB	45.165	7	1.3777	5.59E-01
A0A0D9RJB8	EML4	108.73	53	1.3776	4.70E-03
A0A0D9R4X7	EHD1	60.626	143	1.3772	2.10E-05
A0A0D9RBJ0	--	61.483	158	1.3769	1.48E-04
A0A0D9QZM8	OGA	95.607	64	1.3764	5.71E-03
A0A0D9RM53	TMX4	39.041	32	1.3763	3.75E-03
A0A0D9RUP7	LZTFL1	32.568	17	1.3763	4.88E-02
A0A0D9RPS3	COX7A2	12.795	12	1.3762	7.40E-04
A0A0D9S7E2	FAAH	62.987	5	1.3759	8.71E-02
A0A0D9S9U5	--	16.45	8	1.375	2.06E-01
A0A0D9S4L8	--	31.295	46	1.3747	2.78E-03
A0A0D9S1W9	--	48.665	6	1.3742
A0A0D9RRS5	DPM1	27.366	27	1.3732	1.86E-03
A0A0D9RCS6	MAPK14	41.279	37	1.3731	1.91E-02
A0A0D9RK06	PLD1	123.91	8	1.3723	2.27E-02
A0A0D9R3U4	PPP1R14B	20.39	8	1.3715
A0A0D9QW63	CAPNS1	28.201	50	1.3705	1.65E-02
A0A0D9R5X4	--	38.91	52	1.3703	1.36E-04
A0A0D9RZ34	CNPY4	27.312	27	1.3701	2.83E-05
A0A0D9RQN5	SLC25A12	74.702	103	1.3693	9.62E-04
A0A0D9QWR5	DOCK1	154.61	36	1.3689	7.54E-04
A0A0D9RN38	SPTBN1	274.67	628	1.3681	3.44E-05
A0A0D9R065	DDB2	47.888	17	1.3674	3.83E-04
A0A0D9RTB3	RWDD1	27.939	11	1.3667	2.67E-01
A0A0D9S435	SYNGR2	24.779	10	1.3667	6.91E-03
A0A0D9RJ41	SRI	20.372	20	1.3663	3.41E-02
A0A0D9RGC0	NME3	19.015	37	1.366	3.14E-04
A0A0D9R3W0	TRIOBP	243.12	27	1.3659	1.72E-03
A0A0D9R868	HEBP1	21.099	17	1.3658	1.70E-02
A0A0D9S150	PAFAH1B3	25.818	55	1.3654	1.96E-04
A0A0D9RBT7	DDX58	106.35	6	1.3653	4.83E-02
A0A0D9R2R8	NUB1	73.149	60	1.3641	3.10E-04
A0A0D9S7F8	AKR1A1	36.632	96	1.3635	1.85E-04
A0A0D9RS19	SPR	28.048	48	1.3622	1.31E-02
A0A0D9S411	IFI16	81.926	146	1.3621	3.30E-03
A0A0D9RSF2	TTC21B	150.93	41	1.3618	1.99E-02
A0A0D9RLA1	ZZEF1	332.25	27	1.3594	4.74E-02
A0A0D9RDV7	ARPC4	19.667	38	1.3568	1.75E-03
A0A0D9QZE0	ACSF2	68.352	32	1.3565	1.67E-04
A0A0D9R7A9	ZFAND2B	28.073	13	1.356	8.95E-01
A0A0D9S6F1	CHMP2A	25.104	8	1.3557	3.04E-01
A0A0D9RNV8	TRMT5	63.132	13	1.3553	1.15E-01
A0A0D9RT53	HEATR5A	222.58	12	1.3549	3.83E-01
A0A0D9RAT8	NUP210	170.18	109	1.3545	7.11E-04
A0A0D9S392	GIT2	84.56	8	1.3543	2.84E-02
A0A0D9QW57	PRKAR1A	42.992	68	1.3539	3.61E-04
A0A0D9RS31	SMPD2	47.784	5	1.3539	5.97E-02
A0A0D9RIR1	OSGEPL1	45.351	9	1.3536	4.42E-02
A0A0D9S4B7	SGSH	47.546	46	1.3536	1.04E-02
A0A0D9R1A3	TFG	31.359	45	1.3528	2.78E-03
A0A0D9RZX3	TMEM120A	40.719	11	1.3527	8.33E-03
A0A0D9SBM5	--	10.803	13	1.3519	8.93E-02
A0A0D9SD81	--	70.051	156	1.3517	2.18E-04
A0A0D9RY48	AFG3L2	78.58	84	1.3496	3.90E-04
A0A0D9R9B6	TSTA3	35.822	27	1.3491	1.24E-03
A0A0D9S247	RAB5C	27.753	60	1.3478	2.42E-02
A0A0D9R221	MYO1D	116.19	71	1.347	2.71E-03
A0A0D9R9M3	IFT122	141.7	26	1.3469	1.44E-04
A0A0D9QW54	COX7A1	9.0784	7	1.3464	1.78E-02
A0A0D9S3V8	UBE2Z	38.21	23	1.3459	1.59E-04
A0A0D9RC76	MAP2	217.54	5	1.3458	6.94E-02
A0A0D9RVE7	SSNA1	13.586	7	1.3455	1.16E-01
A0A0D9QZR4	SFXN3	35.514	58	1.3446	8.75E-03
A0A0D9QUX4	--	55.334	37	1.3438	8.89E-03
A0A0D9RG03	MAIP1	32.579	14	1.3436	3.07E-02
A0A0D9R914	PARP10	109.77	12	1.3431	9.38E-02
A0A0D9S4X7	OGFOD3	35.625	41	1.3424	2.36E-03
A0A0D9RDJ9	CCNK	46.686	18	1.3417	2.73E-01
A0A0D9QZD7	CAT	59.97	83	1.3414	4.87E-04
A0A0D9S262	DYNC2H1	493.04	91	1.3397	6.78E-03
A0A0D9S2R0	GALNS	54.344	18	1.3395	3.15E-04
A0A0D9R2Z3	SLC4A2	136.52	11	1.3386	7.12E-03
A0A0D9RSP6	VAV2	103.11	28	1.3381	7.30E-02
A0A0D9RMH0	VDAC1	29.278	84	1.338	6.40E-04
A0A0D9QVY3	PITPNC1	38.303	11	1.3374	2.06E-04
A0A0D9RQ92	NUCKS1	27.296	27	1.3371	3.97E-03
A0A0D9RPP8	SCRN1	46.311	16	1.3369	2.52E-02
A0A0D9S7J1	HYI	30.487	15	1.3365	1.65E-01
A0A0D9RG34	--	22.789	25	1.3353	2.36E-02
A0A0D9RIK8	TLN2	271.5	58	1.335	6.38E-02
A0A0D9S7Q1	RRAGC	44.223	28	1.3343	1.15E-03
A0A0D9R252	TKFC	59.121	60	1.3339	1.81E-02
A0A0D9R6K0	--	17.92	10	1.3338	5.29E-03
A0A0D9SD09	--	11.367	222	1.3338	4.25E-04
A0A0D9RHP5	COMT	30.274	41	1.3336	4.70E-02
A0A0D9R1B3	MCRS1	51.803	6	1.3332	3.19E-01
A0A0D9RNP4	ISOC1	25.919	18	1.3324	1.16E-01
A0A0D9RF58	TBC1D2	105.57	13	1.332	3.14E-02
A0A0D9R5V5	SERPINE2	45.232	38	1.3317	2.01E-03
A0A0D9RCD7	OXNAD1	36.489	7	1.3317	6.74E-01
A0A0D9QWJ3	DPYSL4	61.972	34	1.3313	3.62E-02
A0A0D9RYC3	EPB41L3	122.63	98	1.3313	1.87E-03
A0A0D9RFE7	PIK3CB	122.82	21	1.3311	2.49E-03
A0A0D9RSX3	ERLIN2	40.683	54	1.3306	9.47E-04
A0A0D9QWT5	PDPR	98.592	27	1.3304	2.40E-02
A0A0D9QUM6	CCDC90B	29.377	15	1.3292	1.58E-01
A0A0D9RKU2	PRKCD	77.455	13	1.3284	3.38E-03
A0A0D9R4B9	--	21.297	7	1.3277	5.02E-02
A0A0D9S5R1	THEM4	27.117	12	1.3272	3.33E-02
A0A0D9QXT7	DCK	30.433	8	1.3261	3.13E-01
A0A0D9RTU2	GPD2	80.835	57	1.326	2.05E-03
A0A0D9S710	WLS	64.586	7	1.3255	3.67E-03
A0A0D9RSM6	RAB11FIP1	129.61	9	1.3252	9.30E-03
A0A0D9S8L2	PLOD1	80.673	98	1.3246	6.67E-04
A0A0D9RT40	H2AFV	13.509	19	1.3236	9.56E-02
A0A0D9RIL4	HIBCH	41.323	49	1.3235	4.80E-04
A0A0D9RLA4	MCCC1	80.474	42	1.3229	2.32E-05
A0A0D9RUS0	HNMT	36.574	5	1.3218	6.97E-02
A0A0D9SD67	PGK2	44.836	54	1.3204	3.85E-01
A0A0D9S6X0	ADGRL2	145.51	10	1.3202	3.29E-01
A0A0D9RMX3	OVCA2	24.331	9	1.3199	1.09E-02
A0A0D9S380	GLTP	23.85	18	1.3199	3.05E-03
A0A0D9S6N5	AGL	174.79	77	1.3199	1.42E-03
A0A0D9R981	PPL	204.17	155	1.3197	1.98E-04
A0A0D9R5U5	CAPN1	92.005	83	1.319	2.62E-03
A0A0D9RC71	DSN1	40.307	6	1.3189
A0A0D9QUV4	MAPT	89.741	39	1.3187	2.62E-03
A0A0D9RE84	SNRPD3	13.916	41	1.3184	4.81E-03
A0A0D9QV75	ATP6V0D1	40.18	37	1.3179	3.07E-03
A0A0D9R471	LPCAT4	57.128	11	1.3177	6.46E-02
A0A0D9RUC5	NBEAL2	299.37	4	1.3162
A0A0D9RN65	ABHD14B	29.161	22	1.3161	3.24E-03
A0A0D9RF73	PTDSS2	56.202	9	1.3159	4.21E-02
A0A0D9RZG9	SLC12A9	96.173	31	1.3147	8.46E-03
A0A0D9RP61	LNPEP	117.08	73	1.3138	2.28E-03
A0A0D9RVX2	ITGA1	130.89	53	1.3134	1.26E-03
A0A0D9RWJ9	--	99.741	19	1.3129	3.98E-02
A0A0D9R303	DKC1	57.728	71	1.312	5.82E-03
A0A0D9R5D2	ARL2	20.831	25	1.312	1.97E-03
A0A0D9S1W8	COTL1	15.972	17	1.3115	2.10E-02
A0A0D9R2R9	--	113.87	32	1.3109	2.86E-03
A0A0D9R4F3	RIPK1	75.99	32	1.3107	4.36E-02
A0A0D9RFL1	NFIC	55.674	8	1.3107	2.68E-01
A0A0D9S874	SRRM1	64.965	12	1.3107	3.10E-02
A0A0D9R080	NAGA	46.464	20	1.3104	3.74E-03
A0A0D9R6R9	WDR35	133.47	27	1.3098	2.03E-04
A0A0D9RZ16	NAA16	101.43	7	1.3091
A0A0D9RH29	ADCK1	59.698	6	1.309	7.66E-02
A0A0D9SCR9	--	13.336	8	1.3089	2.95E-02
A0A0D9S0B5	--	75.004	80	1.3085	8.15E-04
A0A0D9S6K8	--	64.37	19	1.3078	2.67E-03
A0A0D9R5A2	IVD	46.082	27	1.3076	1.96E-03
A0A0D9S350	--	30.835	6	1.3071	1.04E-01
A0A0D9RD74	--	49.915	123	1.3059	2.24E-03
A0A0D9RU51	LANCL2	50.794	79	1.3056	9.90E-04
A0A0D9QYM2	ACSL5	76.166	38	1.3052	7.30E-02
A0A0D9R0L9	HOGA1	35.437	24	1.3049	2.36E-02
A0A0D9R6B9	TRIM38	53.505	9	1.3047	4.70E-01
A0A0D9S330	BAX	21.208	35	1.3047	9.30E-03
A0A0D9RNL4	CRK	22.905	44	1.304	9.54E-03
A0A0D9R716	RAB1B	24.422	67	1.3019	9.66E-03
A0A0D9R051	ARHGAP1	50.538	77	1.3009	6.92E-05
A0A0D9S4J4	COQ5	37.103	17	1.3006	1.08E-01
A0A0D9RPM3	PSMA3	28.433	49	1.3001	1.55E-02
A0A0D9R479	RAB34	29.114	16	1.2999	2.13E-01
A0A0D9RR74	CTSH	37.361	2	1.2992	2.82E-01
A0A0D9RHK2	LMF1	64.877	8	1.299	2.54E-02
A0A0D9RG77	SYNPO	121.53	52	1.2987	1.68E-02
A0A0D9RL72	PSMD5	56.142	105	1.2986	1.90E-03
A0A0D9RLW4	ATP5F1C	33.08	30	1.2986	5.39E-04
A0A0D9QVI4	POLG2	54.891	25	1.298	1.62E-01
A0A0D9QYB1	ATP5F1B	56.404	239	1.297	3.29E-05
A0A0D9S3B7	TAGLN	22.625	38	1.2962	4.08E-04
A0A0D9RK82	RBCK1	57.77	11	1.2958	6.85E-02
A0A0D9R1G1	TUBA1A	50.135	173	1.2946	1.23E-01
A0A0D9S4P1	MYH14	231.65	102	1.2939	3.06E-03
A0A0D9RBY8	CRYZL1	40.012	11	1.2935	4.05E-01
A0A0D9S6Z3	CRYZ	35.27	69	1.2931	7.73E-04
A0A0D9R437	ARHGEF5	176.04	4	1.2929	1.63E-01
A0A0D9RP46	RMND1	51.529	12	1.2925	1.19E-02
A0A0D9R4N8	PQLC3	22.539	9	1.2924	3.16E-01
A0A0D9RCE7	EPB41L1	171.48	94	1.2909	7.35E-04
A0A0D9R7G0	MGST1	17.706	19	1.2904	5.22E-02
A0A0D9RYF7	ENOSF1	49.747	36	1.2902	6.32E-03
A0A0D9SDT2	--	23.03	45	1.2901	3.77E-03
A0A0D9RKX1	EXD2	71.442	13	1.2899	3.72E-01
A0A0D9S4V2	--	27.078	43	1.2896	2.51E-02
A0A0D9R1Z8	SPNS1	61.018	12	1.2893	6.42E-03
A0A0D9S956	--	23.369	7	1.2886	4.09E-01
A0A0D9R8E0	RPN1	68.721	162	1.2885	1.36E-04
A0A0D9RRB6	AP3M2	46.988	9	1.2885	1.58E-01
A0A0D9QWX3	LHPP	29.068	11	1.2877	2.04E-01
A0A0D9S4Q4	TMEM120B	40.183	13	1.2872	9.29E-03
A0A0D9R8A8	CDKN1B	22.097	23	1.2868	4.94E-02
A0A0D9QVY5	PSMD7	37.011	57	1.2867	8.79E-02
A0A0D9RLJ6	MRPS26	24.288	11	1.2864	1.25E-01
A0A0D9S8Z8	ISG15	18.015	9	1.2863	6.23E-02
A0A0D9REZ6	--	22.274	26	1.2861	2.83E-02
A0A0D9RVA8	GUK1	23.754	13	1.2855	2.85E-01
A0A0D9S0B7	VKORC1L1	19.776	10	1.2852	2.80E-02
A0A0D9RIL8	ARF4	20.511	62	1.2851	1.00E-02
A0A0D9S6H9	AHCYL1	58.951	35	1.285	9.51E-02
A0A0D9QXD3	GOT2	47.409	86	1.2849	5.78E-04
A0A0D9QY76	HPS5	127.44	10	1.284	8.83E-02
A0A0D9R8J3	MROH1	181.16	25	1.2838	2.78E-01
A0A0D9RC88	RFTN1	57.108	22	1.2835	2.08E-01
A0A0D9QUU5	NSF	85.182	103	1.2831	9.46E-05
A0A0D9SB14	KBTBD11	65.669	17	1.2831	3.74E-01
A0A0D9S4L0	MLEC	32.38	57	1.2826	5.20E-03
A0A0D9SE59	MYADM	35.252	21	1.2822	6.22E-03
A0A0D9S605	ISOC2	22.369	17	1.282	2.15E-01
A0A0D9S6M8	RTCA	39.409	51	1.2819	1.18E-03
A0A0D9RH66	ARMC10	33.827	28	1.2817	9.46E-02
A0A0D9R712	PARN	73.289	19	1.281	3.25E-02
A0A0D9RQS1	QRSL1	57.293	6	1.2808	3.05E-01
A0A0D9RUT7	WDR1	66.193	159	1.2807	2.59E-05
A0A0D9RB27	ERGIC1	32.468	32	1.2798	9.23E-03
A0A0D9RQZ1	--	15.807	34	1.2798	1.99E-02
A0A0D9R4Y2	DTX3L	83.099	27	1.2795	1.10E-02
A0A0D9RSW7	MRPS2	32.823	12	1.2784	1.86E-01
A0A0D9RWC0	WDR33	145.88	8	1.2782	2.81E-01
A0A0D9S4H5	FAM118B	39.482	11	1.2775	8.36E-02
A0A0D9SDA4	RBMXL2	42.934	20	1.2763	1.81E-02
A0A0D9RZQ0	SLC25A6	32.866	21	1.2762	1.23E-02
A0A0D9RVS8	DNAJC5	18.801	19	1.2759	9.80E-02
A0A0D9S0B2	ASL	51.731	51	1.2759	4.82E-04
A0A0D9S1L8	ENDOD1	55.083	22	1.2758	1.25E-03
A0A0D9S370	MVK	42.554	10	1.2756	2.75E-01
A0A0D9QZX5	BST2	19.87	5	1.2753
A0A0D9RPK1	MTX2	29.691	32	1.2748	2.96E-01
A0A0D9S0X2	MGARP	25.258	8	1.2748
A0A0D9RPC2	SCAMP2	36.369	12	1.2731	5.44E-02
A0A0D9S1A5	ETHE1	28.027	40	1.2721	3.17E-03
A0A0D9S2C3	FKBP10	64.308	73	1.272	7.23E-03
A0A0D9R6W3	BANF1	10.058	39	1.2719	4.85E-02
A0A0D9RN37	SMAP1	50.528	5	1.2709	4.80E-01
A0A0D9RNM0	IDI1	32.107	21	1.2703	9.79E-03
A0A0D9S018	LIMK1	72.632	9	1.2699	7.27E-02
A0A0D9R5E5	DNAJC17	34.595	6	1.2695
A0A0D9RZP1	--	211.08	36	1.2692	8.82E-02
A0A0D9RNS0	GSDME	54.413	6	1.2689	3.16E-01
A0A0D9S5W3	PEX11B	26.24	4	1.2682	4.24E-03
A0A0D9R4H2	BPHL	32.488	12	1.2678	1.71E-02
A0A0D9RRM9	DMAC2L	23.15	6	1.2673
A0A0D9RJQ7	NCF2	59.722	5	1.2672	1.01E-01
A0A0D9RMV0	TOR2A	35.891	7	1.2671	2.57E-01
A0A0D9RPI0	ACAA1	47.289	66	1.2671	7.96E-04
A0A0D9RST0	CTBP1	45.552	23	1.2665	9.80E-04
A0A0D9R395	MECP2	51.8	27	1.2662	2.19E-03
A0A0D9RW73	--	26.213	25	1.2662	2.40E-03
A0A0D9S3S0	ALDH2	56.387	110	1.2656	2.41E-03
A0A0D9RXI1	COX5B	13.717	14	1.2651	4.16E-02
A0A0D9S4L4	ACADS	44.382	26	1.2647	8.26E-03
A0A0D9RPW5	PTPN9	67.993	16	1.2642	3.16E-01
A0A0D9QZZ6	ITGAX	127.98	13	1.2639	3.77E-02
A0A0D9RHH9	ACSS2	78.589	34	1.2637	1.63E-04
A0A0D9RLS9	CDS2	51.555	13	1.2634	4.50E-01
A0A0D9RQ40	RNF123	148.76	7	1.2633	2.01E-01
A0A0D9S1T3	ATP6V0A1	96.35	67	1.2631	1.19E-04
A0A0D9S220	PALLD	108.61	21	1.2629	1.19E-02
A0A0D9R8B5	MCU	36.571	23	1.2626	4.45E-02
A0A0D9R8S0	HADHB	51.415	78	1.2621	2.43E-03
A0A0D9RNS4	OSBPL3	101.08	95	1.2615	5.87E-03
A0A0D9S2K7	KPTN	47.901	9	1.2615	4.73E-01
A0A0D9S6Z7	FPGT	67.932	8	1.2615	5.44E-01
A0A0D9S3G4	--	14.299	12	1.2611	2.03E-01
A0A0D9R7J4	VARS2	118.48	29	1.2608	2.05E-03
A0A0D9RFZ5	SPATS2L	64.591	57	1.2606	6.60E-03
A0A0D9RJD6	CLIC5	28.165	13	1.2605
A0A0D9RR16	MAPKAPK2	45.521	10	1.2599	1.05E-02
A0A0D9S3P1	ACAD10	118.39	24	1.2599	9.61E-03
A0A0D9S9R0	--	29.673	116	1.2595	5.19E-03
A0A0D9R002	MSI2	35.196	23	1.2593	2.50E-01
A0A0D9RAK4	UBP1	60.45	8	1.259	3.80E-01
A0A0D9RBZ0	ATG7	78.015	17	1.2573	7.12E-03
A0A0D9RV95	MRPL55	15.138	7	1.257	5.59E-01
A0A0D9S8R7	DNAJC11	63.259	55	1.257	8.80E-02
A0A0D9R1J8	PRKAG1	37.593	40	1.2567	1.28E-02
A0A0D9RDN9	AP2A2	104.01	155	1.2567	1.33E-04
A0A0D9RLR1	H2AFY	39.055	112	1.2566	3.38E-03
A0A0D9RUB2	DOCK5	215.33	12	1.2561	3.66E-01
A0A0D9S6M4	SLC30A7	41.673	10	1.2556	3.00E-01
A0A0D9R6P7	RAB11B	24.488	45	1.2555	3.19E-03
A0A0D9RBS7	ACO1	99.279	105	1.2547	5.07E-03
A0A0D9QX35	SEPT11	49.398	86	1.2543	3.52E-05
A0A0D9RXT3	PGM3	59.866	27	1.2541	2.60E-02
A0A0D9R038	ERLIN1	39.185	21	1.254	6.43E-04
A0A0D9R6H5	--	39.7	55	1.2536	2.36E-02
A0A0D9R9T3	SCCPDH	47.098	13	1.2535	2.75E-01
A0A0D9RH70	--	128.23	20	1.2532	4.61E-03
A0A0D9RA59	TRIP10	62.594	49	1.2528	2.90E-02
A0A0D9RMC5	--	110.17	13	1.2507	6.96E-01
A0A0D9RIJ3	TOR1AIP1	67.509	60	1.2501	3.57E-04
A0A0D9S5I4	RAN	17.203	64	1.25	2.14E-01
A0A0D9RU19	PHPT1	13.828	14	1.2496	3.10E-01
A0A0D9R4E9	NQO2	26.209	23	1.2494	3.36E-01
A0A0D9RUX3	--	32.72	8	1.2474	1.16E-01
A0A0D9RQP6	CTPS2	65.623	52	1.247	7.22E-02
A0A0D9S6V4	BCL10	26.209	19	1.2468	6.18E-06
A0A0D9QVF0	PAPSS1	70.877	38	1.2466	3.47E-03
A0A0D9RC17	BAG1	38.065	16	1.2466	7.40E-05
A0A0D9R2J7	CMC4	7.7309	7	1.2463	2.22E-01
A0A0D9S2A5	ACLY	66.541	167	1.2462	9.40E-04
A0A0D9R8R9	BDH1	38.071	19	1.2461	2.58E-01
A0A0D9RME4	ARAF	67.624	15	1.246	2.65E-03
A0A0D9RJD3	ITGAV	115.95	207	1.2459	3.39E-04
A0A0D9RIN0	DLST	48.955	43	1.2454	1.47E-02
A0A0D9RZX2	TXNL1	32.328	61	1.245	3.28E-03
A0A0D9S4X9	ACAD8	44.901	12	1.245	8.98E-02
A0A0D9RH12	SUCLG2	46.515	69	1.2449	1.42E-03
A0A0D9R4E2	HPCAL1	22.285	20	1.2443	2.86E-03
A0A0D9R8W6	LSM2	10.834	26	1.2442	2.79E-01
A0A0D9RAW9	M6PR	31.103	32	1.2442	4.00E-03
A0A0D9RTC7	ADD1	69.986	35	1.2433	3.93E-02
A0A0D9RKC4	NMT2	56.763	23	1.243	4.80E-02
A0A0D9S4S8	DCXR	25.803	40	1.243	1.40E-02
A0A0D9R924	PLEC	523.32	1276	1.2423	2.29E-04
A0A0D9RJR3	--	36.066	29	1.2417	4.77E-02
A0A0D9RLJ3	PREPL	83.986	75	1.2417	2.54E-02
A0A0D9RTS9	THTPA	25.356	10	1.2414	1.06E-01
A0A0D9RZE8	ATP5F1A	59.745	186	1.2414	4.43E-05
A0A0D9S5J1	CNOT3	81.688	14	1.2403	1.19E-03
A0A0D9RZA0	LRCH4	73.662	10	1.2402	9.93E-01
A0A0D9R5D6	GCHFR	9.6561	11	1.2401	4.32E-01
A0A0D9RIT0	HSDL2	41.575	55	1.2393	2.19E-01
A0A0D9QZT4	COLGALT1	71.73	88	1.2382	8.21E-04
A0A0D9R772	GNL1	68.632	42	1.2382	4.56E-02
A0A0D9S3F5	PIP4K2B	40.469	13	1.2382	1.62E-01
A0A0D9R565	ERGIC2	42.516	34	1.2381	3.16E-02
A0A0D9RGR5	KLC4	70.243	8	1.238	3.71E-01
A0A0D9RD16	GATM	48.531	10	1.2377	5.13E-01
A0A0D9R302	--	25.63	22	1.2374	2.61E-01
A0A0D9R706	PACS1	104.8	43	1.2364	9.40E-04
A0A0D9R8W5	AK3	25.483	46	1.2364	4.31E-03
A0A0D9S221	STAT5B	89.881	26	1.2362	8.36E-02
A0A0D9SAA7	TPBG	46.009	25	1.2361	2.61E-01
A0A0D9R5J6	MPST	35.491	40	1.2348	8.17E-02
A0A0D9RL47	GCLC	72.76	23	1.2348	2.12E-02
A0A0D9QYI1	--	18.193	24	1.2347	2.56E-02
A0A0D9RLB5	WDR13	62.143	12	1.2347	3.17E-02
A0A0D9RTQ2	DHRS1	34.019	20	1.2347	2.48E-01
A0A0D9RL85	ANKFY1	128.66	58	1.2346	5.63E-03
A0A0D9S182	C11orf54	35.127	10	1.2346	2.53E-01
A0A0D9S3P0	NCSTN	78.464	30	1.2346	1.40E-02
A0A0D9S3F8	PSMB3	22.963	41	1.2339	6.08E-02
A0A0D9RQH3	TBC1D2B	100.27	29	1.2338	9.99E-02
A0A0D9S6G0	ATP5PB	28.774	66	1.2337	3.88E-03
A0A0D9RXY5	PCID2	46.057	24	1.2327	1.30E-01
A0A0D9RAD2	PBX2	45.877	4	1.2324
A0A0D9RGN4	ORC5	50.2	12	1.2322	3.57E-01
A0A0D9QXY0	--	69.69	59	1.2321	5.58E-03
A0A0D9RPX1	CRAT	71.015	19	1.2314	6.16E-02
A0A0D9SCL7	HIST1H1C	21.579	28	1.2314	4.22E-02
A0A0D9RQX7	XRCC4	38.169	18	1.2312	1.44E-02
A0A0D9RSJ5	ASH2L	51.635	10	1.2305	8.52E-02
A0A0D9S3F3	PPOX	50.675	27	1.23	1.96E-01
A0A0D9R6D9	--	142.03	5	1.2296	4.91E-01
A0A0D9S887	LYPLA2	24.737	28	1.2295	5.89E-02
A0A0D9R746	CPPED1	35.266	15	1.2294	5.02E-02
A0A0D9QVQ1	RAB21	24.263	41	1.2291	4.82E-02
A0A0D9R621	VPS26A	38.169	92	1.2291	1.30E-02
A0A0D9RPN2	ACTR10	46.307	46	1.2282	1.54E-01
A0A0D9R514	--	37.311	16	1.2281	3.24E-02
A0A0D9R6I9	RDH14	36.589	11	1.2269	4.35E-01
A0A0D9QV09	RPS16	16.445	27	1.2267	1.62E-03
A0A0D9QVC7	--	14.478	58	1.2266	2.00E-01
A0A0D9RHP8	MBNL1	42.907	13	1.2265	4.07E-01
A0A0D9R9M9	GSDMD	46.629	31	1.2257	8.12E-03
A0A0D9RLM9	VPS16	94.685	48	1.2256	3.29E-03
A0A0D9QX96	LSM14A	42.459	10	1.2254
A0A0D9S7T3	AGO1	97.213	20	1.2254	5.78E-02
A0A0D9R1R9	PEX12	40.819	5	1.2249	2.24E-01
Q1AL65	NADH5	67.701	17	1.2249	9.61E-03
A0A0D9QZB6	--	16.071	7	1.2248	5.49E-01
A0A0D9S2I0	APPL2	74.517	30	1.2248	7.52E-02
A0A0D9R7R3	TOM1L2	58.797	14	1.2245	3.68E-02
A0A0D9RPL9	GLRX	11.749	8	1.2245	1.35E-01
A0A0D9RZ64	--	27.883	24	1.2245	4.04E-01
A0A0D9S407	--	89.83	98	1.2241	6.60E-04
A0A0D9QVL0	GNA13	44.049	40	1.2239	2.50E-02
A0A0D9RG93	--	63.478	305	1.2236	2.35E-03
A0A0D9RDC9	TSPAN6	27.565	10	1.223	7.42E-02
A0A0D9QZM1	SAMM50	50.758	80	1.2227	4.93E-04
A0A0D9RQS4	FKBP9	63.042	48	1.2225	2.46E-01
A0A0D9RB92	STT3B	93.599	41	1.2218	4.78E-03
A0A0D9SDY5	--	14.759	44	1.2217	3.91E-04
A0A0D9RPF0	RAB2A	23.545	68	1.2205	1.04E-04
A0A0D9QZM2	MAP1S	112.7	38	1.2204	3.21E-02
A0A0D9R9H4	NAPRT	57.65	65	1.2204	1.26E-01
A0A0D9S1Y7	OPA3	19.949	9	1.2203	6.14E-02
A0A0D9QXJ1	PRDX3	27.79	39	1.22	9.53E-05
A0A0D9R7H3	TBC1D9B	138.92	75	1.22	1.69E-03
A0A0D9RPI2	APOO	22.311	13	1.2194	9.25E-03
A0A0D9RV25	CDC42BPA	213	5	1.2194	7.09E-02
A0A0D9RAG9	CLTB	23.215	29	1.2192	1.06E-02
A0A0D9R833	ZC3HAV1	113.93	84	1.219	2.37E-03
A0A0D9SD61	SCO2	29.936	13	1.2188	3.45E-03
A0A0D9R0P9	VMP1	46.214	4	1.2185
A0A0D9RX43	AMACR	42.055	18	1.2181	9.33E-03
A0A0D9S7F9	PRDX1	22.15	164	1.218	3.32E-04
A0A0D9RLF8	PI4KA	231.29	123	1.2179	1.18E-03
A0A0D9RFN2	GON7	10.763	24	1.2178	1.36E-01
A0A0D9RCV7	ARF5	20.529	13	1.2176	7.83E-02
A0A0D9RJA1	NDUFAF6	26.253	7	1.2174	5.02E-01
A0A0D9R8R6	UNC93B1	66.658	20	1.217	2.31E-02
Q1AL72	COII	25.536	37	1.2168	1.06E-01
A0A0D9RDU4	DNAJC13	254.93	162	1.2167	3.41E-03
A0A0D9RPX0	CHN1	49.835	7	1.2166	4.63E-02
A0A0D9S7E4	--	13.308	24	1.2165	4.02E-01
A0A0D9S6Q2	ABCD3	75.462	25	1.2164	2.24E-03
A0A0D9SCJ9	HIST1H1B	22.606	10	1.2164	1.16E-02
A0A0D9R5H7	PPFIBP1	116.96	45	1.2161	3.99E-02
A0A0D9R6E8	SMC6	120.01	13	1.2161	4.28E-01
A0A0D9RQC3	UGP2	56.966	77	1.2156	1.60E-02
A0A0D9S4M8	ARHGDIA	20.327	63	1.2153	7.01E-03
A0A0D9SC27	RAP2B	20.504	21	1.2149	3.28E-02
A0A0D9QVT9	SNTB2	44.496	16	1.2146	8.50E-06
A0A0D9RGL2	MGME1	39.155	30	1.2144	1.30E-02
A0A0D9QY46	USP46	42.442	6	1.214	3.62E-01
A0A0D9RWU5	ABRACL	9.0323	21	1.214	1.10E-01
A0A0D9RB43	KIFC1	73.842	11	1.2137	9.91E-02
A0A0D9R3P7	TMED1	25.133	30	1.2135	8.82E-03
A0A0D9RNZ5	URM1	15.623	10	1.2135	5.62E-02
A0A0D9RFH5	COPB2	64.332	109	1.2134	4.17E-04
A0A0D9RW54	TTL	43.186	6	1.2134
A0A0D9QVE6	HADH	34.304	56	1.2131	5.68E-03
A0A0D9S155	DUSP3	20.478	37	1.213	2.05E-03
A0A0D9RV83	ARF1	20.697	26	1.2128	3.87E-02
A0A0D9RV27	SORBS3	80.839	32	1.2125	6.17E-02
A0A0D9RE08	HINT2	17.218	26	1.2124	1.13E-01
A0A0D9RPV6	ALDH7A1	35.585	50	1.2123	3.29E-02
A0A0D9R7F4	FLOT1	42.138	68	1.2122	5.91E-03
A0A0D9R639	PFKL	84.985	110	1.2118	1.87E-04
A0A0D9S388	ERBB2	137.99	6	1.2117
A0A0D9RGM3	CUL7	191.3	15	1.2114	6.83E-02
A0A0D9QZD8	ACTR1A	42.613	54	1.2112	3.19E-02
A0A0D9S3T4	ERP29	28.986	50	1.2112	2.14E-02
A0A0D9SBX2	FAHD1	24.854	28	1.2112	1.85E-02
A0A0D9RCW2	USP5	93.605	132	1.2107	2.26E-03
A0A0D9RSP9	FCHO2	89.095	20	1.2105	3.56E-02
A0A0D9RHQ4	LAS1L	81.959	48	1.2102	4.31E-03
A0A0D9RKP8	CPNE3	60.101	41	1.2094	5.53E-04
A0A0D9RR29	PIR	32.127	22	1.2085	1.23E-02
A0A0D9R721	TRIM26	62.183	6	1.2075	1.93E-01
A0A0D9R8C2	EEFSEC	65.211	33	1.2074	3.05E-01
A0A0D9R409	EMC7	29.976	28	1.2072	4.42E-02
A0A0D9RE47	CYFIP2	145.67	46	1.2071	2.21E-02
A0A0D9RY22	POGLUT2	58.77	103	1.2069	9.37E-04
A0A0D9S2A3	CALM1	16.837	124	1.2068	9.34E-03
A0A0D9RDM2	BMPR2	115.27	30	1.2064	1.74E-02
A0A0D9R2M0	PRDX2	21.892	18	1.2061	1.43E-02
A0A0D9R9F2	PSMD10	24.497	22	1.2057	3.72E-02
A0A0D9SE08	PURB	33.194	25	1.2051	6.88E-02
A0A0D9R7T6	FMC1	12.691	8	1.2048	4.42E-01
A0A0D9QZT5	--	34.401	55	1.2046	6.01E-03
A0A0D9R825	--	259.86	78	1.2041	1.64E-03
A0A0D9RGL3	IFT140	165.04	6	1.204
A0A0D9RVP3	EPB41L2	92.258	74	1.204	2.26E-02
A0A0D9RVQ1	NDRG2	39.217	9	1.2036	2.28E-01
A0A0D9R442	ASAP2	111.6	8	1.2031	6.06E-02
A0A0D9RC36	MOB2	26.926	8	1.2025	9.79E-01
A0A0D9SCI2	THNSL1	83.235	22	1.2018	6.64E-02
A0A0D9S5X6	PPP1R12C	85.814	26	1.2017	8.34E-02
A0A0D9RD99	PPIL1	13.357	11	1.2016	8.30E-02
A0A0D9R8U4	BCS1L	47.49	69	1.2015	7.28E-03
A0A0D9S2C0	NT5C3B	33.628	22	1.2014	2.94E-01
A0A0D9RK63	SRA1	25.653	8	1.2012
A0A0D9RNI3	--	21.94	21	1.2006	7.86E-03
A0A0D9RSU7	CAMK2B	68.93	8	1.2005	1.19E-01
A0A0D9QX29	WDR59	111.97	11	1.2004	8.77E-02
A0A0D9RD61	GNPAT	77.347	44	1.2002	1.10E-02
A0A0D9QUY7	LARP7	66.678	32	1.1996	4.00E-02
A0A0D9RWG8	CARD6	117.14	8	1.1996
A0A0D9R5Z7	ITGB5	87.968	23	1.1993	1.03E-01
A0A0D9RUF7	PSME1	27.523	78	1.199	2.93E-04
A0A0D9RHR5	GGT7	70.51	14	1.1983	2.25E-03
A0A0D9R5U9	GNAQ	35.422	10	1.1981	2.36E-01
A0A0D9RQH5	NCOA5	65.654	35	1.1979	1.04E-01
A0A0D9QZS8	MRPL43	17.746	14	1.1978	1.49E-02
A0A0D9RVT2	ENPP1	78.292	19	1.1977	1.19E-03
A0A0D9RT62	CAMSAP1	165.86	3	1.1975
A0A0D9S4D0	--	595.64	656	1.197	8.45E-05
A0A0D9SAF7	PARS2	53.329	25	1.197	7.19E-02
A0A0D9RG10	LEO1	75.385	4	1.1967	3.27E-01
A0A0D9R6W5	PDXDC1	88.025	57	1.1966	1.73E-01
A0A0D9RSI2	LSM1	15.179	19	1.1962	2.03E-01
A0A0D9RTC1	TNS3	167.21	127	1.1961	6.88E-04
A0A0D9R3J7	BCAP31	25.334	57	1.1958	1.30E-02
A0A0D9RFF9	SPPL2A	59.856	10	1.1958	5.03E-02
A0A0D9RGK7	--	41.026	11	1.1951	1.05E-01
A0A0D9RFK9	OARD1	17.025	17	1.1948	3.65E-02
A0A0D9R4I1	ALDOC	39.368	58	1.1946	3.81E-01
A0A0D9RG47	GNB5	38.773	5	1.1944
A0A0D9RMT4	RP2	39.57	12	1.194	3.09E-03
A0A0D9RQT1	PPP3R1	19.3	11	1.194	3.97E-01
A0A0D9RE62	GATD1	23.262	40	1.1939	9.05E-03
A0A0D9QZG4	NFKB2	96.855	87	1.1936	8.89E-03
A0A0D9RK17	PTER	39.155	39	1.1932	2.42E-02
A0A0D9S6X6	DNAJB4	37.806	7	1.1931	2.76E-01
A0A0D9S860	STMN1	17.302	22	1.193	1.43E-01
A0A0D9RRD2	FAH	46.279	18	1.1919	7.73E-03
A0A0D9R1W6	PFKM	93.327	122	1.1915	6.24E-05
A0A0D9RCP9	WASHC5	134.36	79	1.1913	1.86E-03
A0A0D9S5H6	--	28.94	86	1.191	4.67E-03
A0A0D9RJE2	HSD17B10	27.101	113	1.1909	4.60E-03
A0A0D9QXI2	PIP4K2C	47.343	20	1.1908	4.80E-01
A0A0D9RQB0	ETFA	35.081	93	1.1905	3.69E-03
A0A0D9S7I5	IPO13	108.19	6	1.1905
A0A0D9S7S5	EVA1B	18.474	8	1.1904	3.95E-01
A0A0D9RRJ9	ATL1	63.515	16	1.1902	3.94E-01
A0A0D9RMW4	SMG6	160.39	11	1.1896	3.14E-01
A0A0D9SAP7	HNRNPH2	49.277	40	1.1894	3.67E-02
A0A0D9R7K5	SQSTM1	47.746	58	1.1893	7.66E-04
A0A0D9RSS9	WDR5	36.588	15	1.1893	2.65E-02
A0A0D9R1G2	TUBA1C	49.895	370	1.1888	5.35E-04
A0A0D9RAI2	--	8.5328	15	1.1883	3.03E-02
A0A0D9S732	PGM1	63.888	99	1.1883	2.59E-02
A0A0D9RCS9	TATDN1	31.782	11	1.1878	2.99E-01
A0A0D9RVY0	TSN	26.183	76	1.1877	3.03E-02
A0A0D9R9D2	CAMK2G	65.241	10	1.1875
A0A0D9RKT4	TKT	67.847	258	1.1875	8.14E-04
A0A0D9R2E7	TMLHE	49.536	13	1.1874	1.84E-01
A0A0D9R011	CYB5R3	38.72	112	1.1873	4.87E-02
A0A0D9S2A0	MVD	43.489	33	1.1872	2.36E-03
A0A0D9RIL6	--	118.57	16	1.1867	4.05E-01
A0A0D9R2D4	SUN2	80.463	107	1.1863	1.43E-02
A0A0D9R7I1	DERA	35.272	46	1.1862	6.29E-02
A0A0D9S0C3	PYGB	79.71	122	1.1861	1.45E-03
A0A0D9R0Z4	NDUFA10	40.602	50	1.1859	5.44E-03
A0A0D9R392	ATP6V1A	68.33	106	1.1857	6.95E-05
A0A0D9RQ88	HSD17B4	79.56	121	1.1849	4.36E-04
A0A0D9RI15	STAT4	86.113	15	1.1848	1.22E-01
A0A0D9RU88	NMI	35.139	24	1.1848	1.42E-02
A0A0D9QYY1	--	23.524	58	1.1844	2.67E-03
A0A0D9S7T7	PSMB2	22.836	22	1.1844	1.42E-02
A0A0D9R974	ERMP1	76.488	12	1.1843	8.76E-02
A0A0D9QWF6	ILK	51.419	68	1.1842	1.37E-03
A0A0D9R197	SCLY	48.184	48	1.1842	2.82E-03
A0A0D9RI63	VPS13C	422.4	188	1.1842	3.91E-04
A0A0D9S3Y8	OAS3	77.327	45	1.1841	8.40E-03
A0A0D9S6K6	STXBP3	67.79	36	1.1841	1.26E-02
A0A0D9RJ62	--	50.811	16	1.184	3.64E-01
A0A0D9RV12	THNSL2	57.92	36	1.1835	5.81E-02
A0A0D9R1N6	FKBP11	22.154	6	1.1828	2.93E-01
A0A0D9RJK8	--	12.687	12	1.1827	3.81E-01
A0A0D9RVJ0	ARHGAP18	75.095	25	1.1824	1.18E-02
A0A0D9S037	--	43.186	16	1.1819	5.37E-02
A0A0D9SAZ1	PLPP6	32.288	11	1.1814	4.38E-02
A0A0D9RCJ8	DOCK2	211.96	43	1.1813	2.94E-03
A0A0D9RHB4	DARS2	73.557	73	1.1813	1.02E-02
A0A0D9RX77	--	27.576	34	1.181	2.08E-02
A0A0D9S8E3	EMC1	112.04	91	1.181	7.99E-02
A0A0D9RKN2	SLC25A13	74.185	75	1.1807	4.48E-02
A0A0D9R0D2	STK25	48.129	6	1.1804	9.71E-01
A0A0D9QYH9	CASP7	34.155	36	1.1797	2.35E-03
A0A0D9S9L7	MYORG	81.03	8	1.1788
A0A0D9RAM0	XPC	100.65	18	1.1787	2.86E-01
A0A0D9S0H0	SEPT6	48.872	13	1.1786	4.81E-01
A0A0D9S8R1	PARK7	19.905	34	1.1785	4.76E-02
A0A0D9R0R0	SLC25A17	32.115	10	1.1783	1.33E-01
A0A0D9RGJ9	--	9.9364	8	1.1781	1.12E-01
A0A0D9RER4	--	7.4315	28	1.1777	5.10E-01
A0A0D9R3G2	--	25.509	38	1.1772	6.17E-02
A0A0D9RSB2	CSTF1	48.357	25	1.1771	2.26E-02
A0A0D9RG81	MOB4	26.032	28	1.1769	1.37E-02
A0A0D9S8Q1	H6PD	90.135	102	1.1769	1.53E-03
A0A0D9RTM8	SUCLG1	41.74	52	1.1768	2.88E-03
A0A0D9RIR5	LACTB	60.643	47	1.176	2.17E-03
A0A0D9RZC2	B3GLCT	62.179	21	1.1759	1.02E-01
A0A0D9S4Z6	LMNA	74.07	270	1.1758	1.12E-03
A0A0D9RIV6	KLHL22	71.682	22	1.1755	4.35E-04
A0A0D9RPJ0	PIGT	65.813	26	1.1754	8.05E-02
A0A0D9S6S9	ZNF326	65.299	30	1.1752	2.45E-02
A0A0D9RNP2	COPS5	37.578	55	1.175	4.13E-02
A0A0D9RVW0	PELO	43.435	13	1.1748	3.34E-01
A0A0D9R5M7	FBXL12	37.026	17	1.1747	3.18E-02
A0A0D9QX70	FDXR	53.854	54	1.1745	3.12E-03
Q1AL66	NADH4	52.05	9	1.1745	4.64E-01
A0A0D9R875	DGAT1	55.601	14	1.1744	2.68E-01
A0A0D9S8X0	--	89.974	23	1.1744	5.45E-02
A0A0D9RDE3	EML1	90.299	28	1.1741	8.99E-03
A0A0D9QYR5	CS	51.698	64	1.1738	8.59E-04
A0A0D9RCH1	EFR3A	92.893	43	1.1738	3.03E-02
A0A0D9RLG1	ITPA	22.551	29	1.1731	2.21E-01
A0A0D9RB41	AGO2	102.45	52	1.173	5.28E-02
A0A0D9RRF2	TMX1	31.8	38	1.1718	5.82E-02
A0A0D9S3X0	RRAS	23.464	32	1.1718	3.43E-02
A0A0D9RGN3	MRPL2	33.324	10	1.1714	3.09E-01
A0A0D9R2I9	NIPA1	27.309	9	1.171	1.61E-01
A0A0D9RNA6	PLCG1	111.77	13	1.171	2.33E-01
A0A0D9RD31	NDUFA5	13.292	46	1.1709	2.13E-02
A0A0D9SA95	LIG4	104.05	13	1.1706	1.83E-01
A0A0D9SBN8	--	22.65	62	1.17	1.83E-02
A0A0D9RKG6	ENO3	47.01	11	1.1696	2.44E-02
A0A0D9QVA5	CASP6	33.316	23	1.1688	2.02E-02
A0A0D9S6P9	CNN3	36.426	80	1.1687	4.09E-03
A0A0D9R299	NSMCE1	34.893	7	1.1686	6.19E-01
A0A0D9S0X5	SLC25A3	40.01	50	1.1686	1.53E-01
A0A0D9S6U4	SH3GLB1	43.166	30	1.1686	1.51E-01
A0A0D9S885	HMGCL	34.206	43	1.1685	5.90E-02
A0A0D9RCS5	NDUFB9	26.477	20	1.1677	7.98E-02
A0A0D9S679	CSDE1	93.741	54	1.1673	1.45E-02
A0A0D9S4X8	THYN1	25.771	18	1.167	3.62E-01
A0A0D9SAQ0	ARMCX1	49.225	4	1.1669	5.18E-01
A0A0D9QZB0	ABTB2	113.51	17	1.1665	4.63E-01
A0A0D9RJU1	VIM	53.708	600	1.1663	4.42E-04
A0A0D9R3I0	IDH3G	44.013	46	1.1659	2.34E-01
A0A0D9RNE9	CXorf38	36.647	43	1.1658	1.05E-02
A0A0D9R149	NIT2	30.796	42	1.1657	1.02E-02
A0A0D9S2E9	CUL5	90.954	67	1.1657	3.80E-02
A0A0D9QVN1	RAB6A	23.562	34	1.1654	1.31E-02
A0A0D9RPQ9	UFL1	89.539	27	1.1654	1.12E-02
A0A0D9RG90	TTC7B	98.132	4	1.165	2.21E-01
A0A0D9RAQ4	SEC14L2	46.114	11	1.1648	3.08E-02
A0A0D9RMG7	NEK7	34.535	15	1.1646	1.10E-02
A0A0D9RPE9	HNRNPA3	39.594	125	1.1642	8.82E-04
A0A0D9RNK1	TRA2A	32.431	13	1.1639	4.72E-02
A0A0D9RYL8	RMC1	74.93	21	1.1639	4.37E-01
A0A0D9REF5	GRHPR	35.659	32	1.1637	4.70E-01
A0A0D9RXX8	PDCD6	16.15	10	1.1636	1.02E-01
A0A0D9RPJ3	ACOT9	51.953	74	1.1635	1.57E-02
A0A0D9RUZ9	PSEN2	50.154	5	1.1625	4.11E-01
A0A0D9R9J2	AP3M1	47.012	66	1.1622	1.39E-01
A0A0D9RMM2	SEPT8	55.756	60	1.1615	2.40E-02
A0A0D9QZC8	ARL3	20.365	34	1.1608	2.88E-03
A0A0D9RIN6	MAP3K4	180.67	12	1.1608	1.23E-01
A0A0D9RWS9	IQGAP1	189.15	517	1.1605	2.42E-04
A0A0D9RTC6	BPNT1	33.438	63	1.1603	3.84E-02
A0A0D9R6M0	OSBPL11	84.075	19	1.1596	8.68E-02
A0A0D9RAC2	ADSS	50.104	47	1.1596	1.99E-02
A0A0D9RUK0	KYNU	52.345	29	1.1596	1.11E-01
A0A0D9RZQ5	TARS2	81.052	30	1.1595	7.53E-02
A0A0D9RCQ7	GALT	43.256	9	1.1593	3.19E-03
A0A0D9RFY3	SLC44A1	73.273	17	1.1589	6.13E-01
A0A0D9RL35	CA2	29.268	23	1.1588	2.17E-01
A0A0D9R4D0	PRDX5	22.236	65	1.1584	4.94E-02
A0A0D9R7A8	H2AFY2	40.088	31	1.1584	2.89E-02
A0A0D9RS46	FAM210B	20.523	11	1.1578	1.53E-01
A0A0D9S2Z8	BCAT2	39.784	38	1.1575	2.30E-02
A0A0D9RVA5	RAB2B	24.2	15	1.1574	4.57E-02
A0A0D9S293	CNP	47.521	50	1.1573	8.19E-03
A0A0D9RI96	NDUFS7	23.412	14	1.1572	2.20E-01
A0A0D9R666	STK26	46.542	22	1.1571	3.41E-01
A0A0D9S1B6	MLYCD	54.907	46	1.1571	4.12E-02
A0A0D9RUU7	SACM1L	66.943	51	1.1567	6.44E-03
A0A0D9R7M3	NHEJ1	33.42	16	1.1565	6.44E-02
A0A0D9S357	HSD17B7	37.895	14	1.1565	3.23E-01
A0A0D9RZT9	CRYL1	34.341	20	1.1564	1.26E-01
A0A0D9RSV8	MOGS	92.036	73	1.1563	3.49E-04
A0A0D9R370	FLNA	279.9	1018	1.1561	2.16E-04
A0A0D9RM58	TTC7A	95.979	23	1.156	5.45E-02
A0A0D9RD91	COPS7A	30.303	13	1.1559	1.29E-01
A0A0D9S058	ZADH2	40.686	9	1.1559	1.61E-01
A0A0D9R3N7	GIT1	73.257	16	1.1558	2.35E-02
A0A0D9RVL3	XPO7	124.24	103	1.1558	2.71E-02
A0A0D9R654	COQ7	24.242	11	1.1557	2.18E-01
A0A0D9RB32	PTK2	117.23	30	1.1556	1.34E-01
A0A0D9R8F2	ACAD9	69.145	46	1.1546	1.81E-02
A0A0D9RYD9	MYL12A	19.764	78	1.1544	1.15E-02
A0A0D9S6T8	KYAT3	51.233	34	1.1542	2.50E-02
A0A0D9R253	ESYT2	71.296	110	1.1541	5.95E-02
A0A0D9R2D9	VAMP7	24.935	34	1.154	1.75E-02
A0A0D9RFA4	ALG2	47.164	67	1.1536	2.10E-02
A0A0D9RFY0	DLD	57.584	42	1.1536	5.99E-03
A0A0D9QVT7	ADH5	39.553	67	1.1535	2.24E-02
A0A0D9RNJ1	EEF1A1	50.14	364	1.1528	2.43E-03
A0A0D9QXB3	PARVA	42.243	44	1.1526	8.13E-02
A0A0D9R5A6	SIRT5	33.834	30	1.1526	7.37E-04
A0A0D9R071	NDUFA6	18.162	16	1.1525	1.12E-01
A0A0D9S055	CNDP2	52.845	78	1.1525	5.47E-02
A0A0D9R8K5	CBR1	25.763	45	1.1521	1.19E-02
A0A0D9SCM3	HIST1H2AA	14.203	14	1.1521	5.08E-01
A0A0D9RZN3	ACAA2	41.807	72	1.152	4.88E-02
A0A0D9RWB5	TBC1D1	143.1	36	1.1519	2.68E-01
A0A0D9S009	ABHD11	33.595	28	1.1518	1.98E-01
A0A0D9RK37	ITPRID2	138.56	5	1.1517
A0A0D9R0F4	RAB8A	23.668	22	1.1516	4.16E-03
A0A0D9RZR4	MRPS21	10.773	12	1.1516	2.49E-02
A0A0D9R827	YWHAH	28.218	61	1.1515	5.18E-03
A0A0D9S0A2	SBDS	28.763	56	1.1514	1.53E-02
A0A0D9S509	TBCD	132.92	193	1.1511	1.82E-02
A0A0D9R4D9	SERPINB6	42.548	45	1.1508	1.08E-02
A0A0D9R229	APOBEC3G	47.174	34	1.1502	6.83E-02
A0A0D9RWX4	UNC45A	87.179	60	1.1498	5.24E-02
A0A0D9RI81	GAMT	26.281	27	1.1497	1.84E-02
A0A0D9S4X3	VPS26B	39.14	21	1.1497	3.30E-01
A0A0D9S5Z6	SEC22B	24.74	44	1.1497	3.72E-05
A0A0D9QWM9	HAUS5	71.718	7	1.1492	4.30E-01
A0A0D9S1T9	STAT3	88.067	105	1.1488	4.94E-03
A0A0D9QXL1	CSNK2A2	41.213	73	1.1487	3.02E-02
A0A0D9RWT0	LIMS1	38.421	37	1.1485	4.03E-03
A0A0D9RCA0	FKBP5	51.077	24	1.1484	3.08E-01
A0A0D9RPJ4	OXSR1	58.074	54	1.1484	2.22E-02
A0A0D9R8C6	CORO1B	54.369	52	1.1482	1.15E-03
A0A0D9RM84	AP2M1	28.447	39	1.1481	9.62E-03
A0A0D9RE49	CLMN	110.03	15	1.148	1.91E-01
A0A0D9RXL5	LMAN2L	41.051	14	1.1479	3.29E-01
A0A0D9QVM5	PAAF1	42.006	20	1.1478	1.44E-02
A0A0D9RSP3	RAB22A	21.839	8	1.1472
A0A0D9SAP4	DPM3	13.247	7	1.1472	1.81E-01
A0A0D9RRV8	ABCB11	146.35	11	1.1471	4.57E-01
A0A0D9RMZ9	P4HA2	60.706	77	1.147	1.19E-02
A0A0D9RG18	CCNY	39.336	8	1.1468	6.18E-01
A0A0D9R7F2	FBXO7	58.354	13	1.1464	1.14E-01
A0A0D9S3B0	PAFAH1B2	25.569	34	1.1464	8.83E-02
A0A0D9S642	PTGFRN	98.517	55	1.1462	1.03E-03
A0A0D9RDH8	UQCC1	34.215	13	1.1461	1.83E-05
A0A0D9RH67	PLSCR3	31.67	9	1.1458	1.76E-02
A0A0D9S8B3	USP48	119.04	25	1.1454	7.91E-02
A0A0D9R111	ADSL	28.647	34	1.1451	8.99E-02
A0A0D9RGE5	RBBP9	21.053	15	1.1451	4.53E-01
A0A0D9RR06	EIF2D	64.464	34	1.1447	7.81E-02
A0A0D9QUP4	ANXA5	35.846	165	1.1443	1.04E-01
A0A0D9S8A9	CDC42	21.258	55	1.1442	2.75E-02
A0A0D9QWF5	VAC14	87.985	51	1.1439	3.03E-03
A0A0D9QYD5	TSG101	43.944	22	1.1439	4.89E-01
A0A0D9RVJ2	--	13.962	37	1.1435	1.80E-02
A0A0D9RRK0	PIGG	98.895	9	1.1434	1.68E-01
A0A0D9RGA5	NAA20	20.368	11	1.1433	2.79E-02
A0A0D9RGV7	EEF1AKNMT	78.571	15	1.1429	5.15E-01
A0A0D9QV93	RPS3	26.688	132	1.1424	3.72E-02
A0A0D9REE3	--	56.33	43	1.1424	3.23E-02
A0A0D9RMW1	ERLEC1	55.032	30	1.1423	3.15E-02
A0A0D9RAM9	DHCR7	54.398	30	1.1419	5.76E-02
A0A0D9R7C5	--	22.367	35	1.1407	1.63E-01
A0A0D9RET1	ABCB7	76.919	5	1.1402	4.32E-01
A0A0D9S1U6	ETFDH	68.466	22	1.1399	2.91E-01
A0A0D9R0S5	GBE1	80.231	97	1.1398	4.87E-03
A0A0D9S3B9	RNF214	83.85	13	1.1395	2.38E-01
A0A0D9R5I6	VPS18	110.14	34	1.1392	1.18E-01
A0A0D9S7C6	CMPK1	25.907	53	1.1392	3.42E-02
A0A0D9RAV7	CAND2	135.07	31	1.139	1.81E-01
A0A0D9R3N8	ZBTB20	73.363	14	1.1389	5.50E-02
A0A0D9RSU0	YKT6	22.417	66	1.1388	1.21E-02
A0A0D9RIR4	PTBP3	56.791	57	1.1387	5.08E-02
A0A0D9RL63	OPTN	65.83	35	1.1387	1.45E-01
A0A0D9RY76	DNAAF5	72.473	100	1.1387	1.61E-03
A0A0D9S795	ZYG11B	83.92	6	1.1386	1.35E-01
A0A0D9S5I3	STX2	33.004	8	1.1385	1.50E-01
A0A0D9RNM2	YWHAE	27.419	215	1.1384	2.57E-02
A0A0D9R533	IPO8	119.96	56	1.138	6.12E-04
A0A0D9R310	HABP4	45.896	25	1.1378	5.33E-01
A0A0D9RLS2	RO60	60.696	88	1.1377	6.98E-02
A0A0D9S041	TMX3	51.853	47	1.1373	4.22E-02
A0A0D9S2T2	ACSF3	63.978	15	1.1372	3.84E-02
A0A0D9RQH0	MBLAC2	31.269	17	1.1371	1.53E-02
A0A0D9S027	CLIP2	111.74	30	1.1371	1.83E-01
A0A0D9RSE0	FLVCR1	59.622	9	1.1368	2.77E-01
A0A0D9R896	CSNK2B	24.942	42	1.1366	4.16E-02
A0A0D9SBD1	--	57.949	381	1.1364	1.26E-04
A0A0D9RH37	PRDX6	25.023	179	1.1363	1.98E-02
A0A0D9RJE1	DHX9	125.08	250	1.1362	1.57E-03
A0A0D9RY99	MICALL2	98.106	11	1.136	3.53E-01
A0A0D9RMD0	PLCB4	137.49	5	1.1358
A0A0D9S095	WDR44	101.7	29	1.1353	1.35E-01
A0A0D9R8S7	CYC1	35.222	23	1.1352	7.40E-02
A0A0D9S4G6	CIT	236.61	6	1.1352	4.32E-01
A0A0D9R4D3	SERPINB1	44.084	51	1.1349	3.68E-03
A0A0D9RBG0	AKT1	55.697	59	1.1348	1.78E-01
A0A0D9RQK6	ACTR2	45.376	75	1.1346	1.05E-02
A0A0D9RY83	GET4	36.487	30	1.1342	4.09E-02
A0A0D9S1C2	VAT1	42.702	90	1.1337	4.73E-02
A0A0D9S0P4	CTSC	51.936	20	1.1335	1.63E-01
A0A0D9RYE0	TBC1D4	128.91	7	1.1334	5.76E-01
A0A0D9R578	HTATSF1	85.678	49	1.1333	1.70E-02
A0A0D9RKR1	RMDN1	35.968	25	1.133	1.78E-01
A0A0D9S3H0	NIT1	35.839	20	1.133	1.97E-01
A0A0D9QZ74	ATP5MD	6.4825	16	1.1328	1.70E-01
A0A0D9RM90	ABCF3	79.719	21	1.132	1.94E-01
A0A0D9QVF7	TBCK	100.78	14	1.1315	4.67E-01
A0A0D9REZ3	DBR1	61.615	33	1.1315	5.50E-02
A0A0D9RN04	RALGAPB	169.54	16	1.1312	4.65E-01
A0A0D9R7N7	SPTBN2	261.58	3	1.131
A0A0D9S9A1	BORCS6	37.233	15	1.1307	2.63E-01
A0A0D9R8K4	GSTP1	42.425	140	1.1303	1.34E-02
A0A0D9REG4	CASP8	57.341	68	1.1293	4.15E-02
A0A0D9R8E3	ABHD16A	63.181	31	1.1291	4.58E-02
A0A0D9RR11	SEPT7	44.854	74	1.1284	1.53E-04
A0A0D9S3E5	LASP1	29.691	82	1.1282	5.17E-02
A0A0D9R1P7	DDX23	95.609	44	1.1281	1.46E-01
A0A0D9S7Q0	MYCBP	11.967	22	1.1275	1.29E-01
A0A0D9S698	AP4B1	83.253	5	1.1272
A0A0D9RLC0	IMPA1	30.256	31	1.127	8.18E-02
A0A0D9R314	POLR2G	19.294	17	1.1269	2.70E-01
A0A0D9RF66	RNH1	49.173	180	1.1269	5.57E-03
A0A0D9R5B2	PBLD	31.861	42	1.1267	6.46E-03
A0A0D9S5D0	AACS	75.139	26	1.1265	6.58E-02
A0A0D9RSZ9	LETM1	83.092	87	1.1262	1.23E-03
A0A0D9RNB8	USP9X	290.38	201	1.126	4.04E-04
A0A0D9RFD9	FAIM	22.609	25	1.1259	3.65E-02
A0A0D9RP06	YWHAB	28.082	62	1.1258	1.10E-01
A0A0D9RN07	ENG	70.734	6	1.1254	1.06E-01
A0A0D9QXT5	GALK1	36.337	30	1.1253	1.49E-01
A0A0D9S122	GAN	67.638	32	1.1253	9.62E-02
A0A0D9R1R5	AP2B1	105.69	148	1.1252	1.66E-02
A0A0D9RY70	ABCC4	149.43	150	1.1252	2.94E-02
A0A0D9RMC0	ARPC5L	16.941	20	1.125	1.24E-01
A0A0D9RHR4	PSMD6	47.955	81	1.1249	1.21E-02
A0A0D9S9H0	PURA	34.91	33	1.1248	2.15E-03
A0A0D9RGH9	LMNB2	69.987	78	1.1245	1.22E-02
A0A0D9RSJ8	ANGEL2	62.284	9	1.1241	4.80E-01
A0A0D9S3Z3	DUSP23	16.588	6	1.1233	5.40E-01
A0A0D9RLG9	DHTKD1	102.9	13	1.123	2.33E-01
A0A0D9RNK4	MYO1C	116.35	164	1.123	5.98E-04
A0A0D9RWK1	UGDH	55.023	174	1.1228	4.09E-03
A0A0D9RMI9	MAPK1	41.389	100	1.1222	1.29E-02
A0A0D9QXA1	--	18.524	74	1.122	2.45E-02
A0A0D9RST9	CTSZ	33.987	23	1.122	1.95E-01
A0A0D9R3E6	KANK2	91.115	61	1.1218	6.67E-02
A0A0D9RLX7	KIN	45.319	10	1.1218	7.95E-01
A0A0D9RDP8	CHID1	44.945	40	1.1215	1.92E-01
A0A0D9R6K4	RELA	59.848	23	1.1209	1.45E-01
A0A0D9QW83	AP1G1	91.379	46	1.1206	2.79E-03
A0A0D9R5D8	PDIA5	59.579	32	1.1205	7.33E-02
A0A0D9R0C0	D2HGDH	61.866	38	1.1204	5.71E-02
A0A0D9S336	GYS1	83.79	37	1.1204	4.63E-03
A0A0D9R9E3	SKIV2L	138.05	23	1.1203	2.79E-01
A0A0D9RT55	CCM2	51.538	23	1.1202	2.58E-01
A0A0D9R6M6	AIFM1	66.811	78	1.1196	2.11E-02
A0A0D9QVJ4	EIF3K	25.059	45	1.1195	5.00E-02
A0A0D9S7T0	ADPRHL2	41.303	27	1.1194	2.54E-03
A0A0D9R0M0	XPNPEP3	56.761	44	1.1193	6.49E-02
A0A0D9RI59	AHCY	47.745	75	1.1193	8.46E-02
A0A0D9RJ37	SLC8A1	70.532	22	1.1187	2.12E-01
A0A0D9SDH4	--	32.817	36	1.1186	2.73E-01
A0A0D9RS72	LPGAT1	43.097	13	1.1184	5.29E-01
A0A0D9RP44	CSK	50.704	42	1.1183	4.70E-02
A0A0D9RBF6	OXSM	49.113	15	1.1182	4.72E-01
A0A0D9RPS0	LMNB1	66.453	106	1.1181	3.37E-02
A0A0D9QV25	TLK2	85.429	9	1.118	4.90E-01
A0A0D9S736	ATG4C	52.483	8	1.1177	3.09E-01
A0A0D9RRU7	MCEE	18.544	6	1.1176	3.17E-01
A0A0D9RPC9	HIBADH	35.385	33	1.1175	7.54E-03
A0A0D9RCK6	ANKRD28	116.14	15	1.1172	5.70E-01
A0A0D9RT59	NT5DC1	51.846	35	1.1168	8.05E-02
A0A0D9S4Z4	WDR45B	38.121	14	1.1166	2.59E-01
A0A0D9RUA7	WFS1	100.29	38	1.1163	2.54E-02
A0A0D9R8X3	CNOT9	33.601	27	1.116	5.02E-02
A0A0D9RDX4	AASS	102.11	12	1.116	6.18E-01
A0A0D9RTK6	MARC2	37.75	14	1.1157	2.30E-01
A0A0D9R0B6	STX4	34.147	15	1.1154	1.14E-02
A0A0D9R3W7	POGLUT1	46.211	9	1.1154	8.65E-02
A0A0D9RIL5	HNRNPLL	52.97	32	1.1154	9.74E-02
A0A0D9QYC3	EXOC1	102.78	15	1.1153	2.76E-01
A0A0D9S2F9	ACSL1	79.942	27	1.1146	3.68E-01
A0A0D9R4I0	SPTLC1	52.768	49	1.1142	2.39E-01
A0A0D9S8W7	GNB1	37.377	68	1.1137	5.57E-02
A0A0D9R1K1	MAPK3	43.077	26	1.1135	7.11E-02
A0A0D9RI00	MYO1B	131.97	161	1.1135	6.42E-03
A0A0D9RS61	RAB11FIP5	70.289	80	1.1135	3.51E-02
A0A0D9RYS6	PMS2	95.777	18	1.1135	4.55E-01
A0A0D9QX89	GPI	67.48	137	1.1132	1.29E-01
A0A0D9S6W8	PRKACB	40.962	43	1.1132	7.90E-02
A0A0D9QWV0	ANXA3	36.426	64	1.1126	2.20E-02
A0A0D9R3F9	ATL3	60.551	97	1.1126	9.70E-04
A0A0D9R2S9	ECHS1	20.604	35	1.1124	3.23E-01
A0A0D9RFM5	RASA2	96.6	43	1.1124	2.77E-01
A0A0D9RQ34	RBBP5	59.152	27	1.1121	4.57E-01
A0A0D9RMI5	UACA	158.51	3	1.112
A0A0D9RRZ2	AP3B1	121.37	74	1.1117	2.45E-02
A0A0D9R3C0	RAB3D	24.218	17	1.1113	6.68E-02
A0A0D9RAN3	CRTAP	46.429	18	1.1113	2.22E-01
A0A0D9S688	TRIM33	122.58	13	1.1113	2.37E-01
A0A0D9S4E2	RPTOR	148.98	56	1.1109	3.74E-02
A0A0D9S1U0	TRAPPC6A	18.766	8	1.1107	4.08E-01
A0A0D9RWN0	RICTOR	189.04	23	1.1104	4.46E-02
A0A0D9QWM4	GNS	62.174	32	1.1103	1.69E-01
A0A0D9SDD5	EXOC8	81.798	31	1.1101	3.05E-01
A0A0D9RSY9	SNX6	34.1	44	1.1099	1.66E-02
A0A0D9R318	TAF6L	67.866	7	1.1094	5.19E-01
A0A0D9S759	PRKAA2	62.349	18	1.1094	1.42E-01
A0A0D9RU33	--	50.549	18	1.109	2.87E-01
A0A0D9S1B5	IRGQ	62.633	18	1.1089	2.19E-01
A0A0D9S4J3	DCPS	38.499	61	1.1082	7.42E-02
A0A0D9R582	PTTG1IP	20.276	10	1.1081	3.30E-01
A0A0D9QZ02	--	23.783	29	1.108	1.31E-01
A0A0D9R6E6	MYH9	226.62	855	1.108	1.01E-02
A0A0D9RSY4	CFL2	18.733	24	1.108	2.43E-02
A0A0D9RF76	CRBN	50.559	11	1.1077	8.37E-02
A0A0D9R7X4	RUFY1	69.099	58	1.1075	1.11E-01
A0A0D9RM87	--	75.096	97	1.107	8.19E-03
A0A0D9RQC0	MDH1	36.44	66	1.1068	7.65E-02
A0A0D9RXP0	RARS2	65.56	52	1.1067	1.40E-01
A0A0D9RE22	RAB4A	24.389	23	1.1066	9.05E-02
A0A0D9QVK3	KRR1	43.726	9	1.1064	1.56E-01
A0A0D9R7J5	DRG2	40.732	47	1.1064	5.30E-02
A0A0D9RY39	CLYBL	29.826	25	1.1063	6.84E-02
A0A0D9RZX0	MDH2	43.903	143	1.1061	5.42E-03
A0A0D9RTH3	GSR	42.989	49	1.106	1.47E-01
A0A0D9RYB8	PSMG3	13.104	10	1.106	4.37E-01
A0A0D9S4E6	CHMP6	23.485	16	1.1058	1.03E-01
A0A0D9R2P0	PRKAG2	58.323	12	1.1053	4.14E-01
A0A0D9RBX9	NRBP1	59.844	42	1.1053	3.93E-01
A0A0D9RZL3	FIS1	16.937	18	1.1053	3.56E-01
A0A0D9QZU2	VPS35	91.706	157	1.1052	1.83E-02
A0A0D9S1S2	COASY	62.472	23	1.105	2.93E-01
A0A0D9S5L2	PUS1	47.695	44	1.1049	1.79E-02
A0A0D9R925	LMAN2	40.202	95	1.1047	1.47E-02
A0A0D9R2T1	GANAB	103.12	192	1.1045	1.54E-02
A0A0D9RCU8	NTPCR	20.706	33	1.1041	5.89E-02
A0A0D9RCY6	NDUFS1	79.518	169	1.1041	8.00E-04
A0A0D9SC47	--	33.734	6	1.1041	6.63E-01
A0A0D9R426	DIP2A	170.42	13	1.1038	4.35E-01
A0A0D9QY55	STAT6	94.289	31	1.1032	5.00E-01
A0A0D9S360	PSMD3	60.995	100	1.1032	1.56E-01
A0A0D9S510	HIP1R	118.32	58	1.1032	1.04E-01
A0A0D9RTG0	SEC16A	252.35	46	1.1031	2.91E-03
A0A0D9RVF1	CCDC93	73.137	33	1.1031	1.02E-01
A0A0D9RBE0	LEMD2	57.688	38	1.1021	1.06E-01
A0A0D9S7N5	CAP1	51.599	158	1.1021	4.72E-02
A0A0D9S4L2	UNC119B	28.136	32	1.102	5.31E-02
A0A0D9R5I5	THUMPD1	39.289	26	1.1019	3.28E-01
A0A0D9RUN4	FYCO1	166.96	56	1.1018	1.05E-04
A0A0D9RXU1	SLC12A7	119.75	17	1.1017	2.30E-01
A0A0D9S146	--	67.615	11	1.1016	3.94E-01
A0A0D9RRU2	NAGK	37.376	39	1.1015	5.36E-02
A0A0D9RS90	PPP2R5A	56.179	14	1.1014	1.49E-01
A0A0D9R5J5	IDNK	20.578	7	1.1012	3.60E-01
A0A0D9RXV6	MRPS5	56.535	37	1.1006	3.36E-02
A0A0D9S0W9	HNRNPUL1	95.765	93	1.1005	2.04E-02
A0A0D9R0N5	CLTC	171.43	549	1.1003	1.30E-03
A0A0D9RHN2	ACADVL	75.081	38	1.1002	2.58E-01
A0A0D9RNX1	CFAP36	39.348	20	1.1002	2.84E-01
A0A0D9RT56	--	44.469	10	1.1002	1.14E-01
A0A0D9S7J8	EBNA1BP2	40.741	33	1.1002	4.42E-01
A0A0D9S7M3	NFYC	54.426	7	1.1002	3.45E-01
A0A0D9R8V2	--	52.602	14	1.1001	4.01E-01
A0A0D9RN83	PARP3	59.802	56	1.1001	1.83E-01
A0A0D9RSS4	WDR54	39.811	21	1.0997	3.56E-01
A0A0D9RA10	BPGM	30.014	42	1.0995	8.30E-02
A0A0D9RNV1	VCPIP1	134.2	33	1.0994	8.91E-02
A0A0D9RZW1	YWHAG	28.302	69	1.0993	6.23E-02
A0A0D9R674	CARMIL1	157.66	40	1.0992	1.46E-01
A0A0D9S6M9	DBT	53.438	42	1.0991	1.11E-01
A0A0D9QUI8	NMT1	56.874	96	1.0988	1.06E-01
A0A0D9RN25	SYNE2	798.63	922	1.0988	9.66E-03
A0A0D9S8V7	RER1	22.958	14	1.0988	3.32E-02
A0A0D9QWY2	SWAP70	68.998	50	1.0986	3.76E-02
A0A0D9R4G5	CDC37	44.468	26	1.0986	2.18E-01
A0A0D9RXS9	ME1	64.194	50	1.0986	1.35E-01
A0A0D9R9W0	NMRAL1	33.144	22	1.0984	3.53E-01
A0A0D9SCB4	BASP1	22.663	98	1.0983	1.05E-01
A0A0D9RBR2	--	14.788	21	1.0982	1.13E-01
A0A0D9S7Q3	FHL3	31.165	13	1.0982	2.63E-01
A0A0D9R036	MYO9B	229.4	67	1.0979	1.93E-02
A0A0D9R8Z3	NDUFS8	24.998	20	1.0979	2.09E-01
A0A0D9RJM7	POFUT1	41.595	27	1.0976	9.20E-03
A0A0D9QX56	SLC9A3R1	38.863	26	1.0974	1.58E-01
A0A0D9RPV4	NDUFAF4	20.138	15	1.0974	3.97E-01
A0A0D9RDR7	CD151	28.11	14	1.0973	2.68E-01
A0A0D9RHF7	AP3D1	137.13	139	1.0972	2.55E-02
A0A0D9RHN5	TXNRD2	54.741	40	1.0971	1.28E-01
A0A0D9R1X5	USP40	140.09	8	1.097	7.11E-01
A0A0D9R5Q3	TMEM11	19.474	13	1.097	3.71E-01
A0A0D9RE26	--	76.495	55	1.097	5.57E-02
A0A0D9S9T1	RHOB	22.123	11	1.097	1.39E-01
A0A0D9R6D3	HK1	102.32	56	1.0969	4.62E-02
A0A0D9RI90	RALY	33.026	52	1.0969	6.10E-02
A0A0D9RCD1	--	16.822	27	1.0968	4.93E-02
A0A0D9S1Y1	MSMO1	35.261	7	1.0968	2.96E-01
A0A0D9S6H8	STRIP1	98.877	22	1.0968	4.85E-01
A0A0D9R7L4	RTCB	55.2	91	1.0965	3.87E-02
A0A0D9R186	TBC1D10B	88.309	5	1.0962	8.84E-02
A0A0D9RCY8	MAT2B	37.551	29	1.0962	2.73E-01
A0A0D9RWK3	SYNM	140.47	62	1.096	2.25E-01
A0A0D9S6I8	GNAI3	40.536	30	1.0958	3.08E-01
A0A0D9S8I7	EFHD2	26.697	77	1.0957	8.58E-02
A0A0D9S9K6	ALDH1B1	57.207	59	1.0956	1.07E-01
A0A0D9QX75	DYNC1LI2	54.099	71	1.0954	6.99E-02
A0A0D9RFP2	NCLN	63.017	62	1.0954	6.05E-02
A0A0D9RC57	TOLLIP	30.281	17	1.095	1.58E-01
A0A0D9S792	SCP2	58.972	52	1.0949	2.02E-01
A0A0D9R0J2	ZNF629	96.672	3	1.0947
A0A0D9SCL8	HIST1H2BB	13.95	14	1.0946	1.22E-01
A0A0D9S8D8	CAPZB	30.598	69	1.0945	2.78E-02
A0A0D9RRA4	ERO1A	54.405	99	1.0941	1.75E-03
A0A0D9QXD6	--	26.499	25	1.094	6.47E-02
A0A0D9RTM6	PIK3R1	83.585	28	1.0939	8.60E-02
A0A0D9RMZ0	RPA1	60.999	98	1.0938	4.59E-02
A0A0D9QWR3	HNRNPDL	46.413	45	1.0934	8.94E-03
A0A0D9R131	FILIP1L	136.54	10	1.0932	3.21E-01
A0A0D9RQR0	CYBRD1	31.93	7	1.0932	8.65E-02
A0A0D9RK94	CCDC22	70.746	86	1.0929	6.57E-02
A0A0D9SCD2	--	44.133	5	1.0928	4.79E-01
A0A0D9QY25	ACOX1	74.507	62	1.0927	3.66E-03
A0A0D9RJQ0	VIRMA	202.01	18	1.0923	5.51E-01
A0A0D9RZR5	ME2	65.454	80	1.0916	2.40E-01
A0A0D9R0E2	SEPT2	41.487	97	1.0913	5.72E-03
A0A0D9S9K4	TMEM246	46.587	6	1.0913	3.51E-01
A0A0D9R9G1	EEF1D	71.202	108	1.0907	3.18E-02
A0A0D9R828	VPS39	86.441	38	1.0902	2.70E-01
A0A0D9R467	IAH1	27.586	34	1.0901	4.54E-01
A0A0D9RVT9	STX7	29.744	17	1.0901	3.09E-02
A0A0D9S492	ENGASE	72.388	11	1.09	2.22E-02
A0A0D9RDZ9	SH3BGRL	12.774	23	1.0899	1.80E-01
A0A0D9RN97	--	37.098	28	1.0899	1.21E-01
A0A0D9RVC3	SUPT16H	119.91	85	1.0899	5.88E-02
A0A0D9S7K5	P3H1	83.234	51	1.0893	5.04E-03
A0A0D9RMS2	PAFAH1B1	38.978	76	1.0892	2.20E-01
A0A0D9S5M6	--	43.017	111	1.0892	7.24E-03
A0A0D9RDY6	URB2	170.95	27	1.089	2.35E-01
A0A0D9RR62	MOSPD2	59.746	15	1.0889	5.06E-01
A0A0D9S3Q5	--	13.114	22	1.0888	3.19E-01
A0A0D9R2I6	ASRGL1	32.084	38	1.0883	4.98E-02
A0A0D9RPV9	EXOC5	81.866	61	1.0882	5.46E-02
A0A0D9RTD1	IARS2	115.33	126	1.0881	2.64E-03
A0A0D9RDB1	MYEF2	64.276	34	1.0877	2.47E-01
A0A0D9R0A5	BCKDK	46.404	22	1.087	1.50E-01
A0A0D9RSK9	SLC26A6	82.056	5	1.087	2.43E-01
A0A0D9S3J6	NPEPPS	103.62	199	1.0868	1.72E-03
A0A0D9S0K6	PRKAB2	30.33	8	1.0867	3.65E-01
A0A0D9R0L0	PHKG2	46.227	6	1.0866	6.92E-01
A0A0D9QW44	SNCA	14.459	18	1.0862	4.99E-01
A0A0D9S4M6	P4HB	57.281	321	1.0862	1.33E-02
A0A0D9S094	PLS3	39.675	54	1.0858	3.36E-03
A0A0D9S2D5	ARHGAP35	170.54	16	1.0858	4.46E-01
A0A0D9R4A7	EXOC2	101.64	55	1.0857	8.64E-02
A0A0D9S789	CPT2	73.788	49	1.0857	1.18E-01
A0A0D9R8S9	--	22.99	13	1.0856	4.45E-01
A0A0D9R6X5	TUBA4A	49.924	18	1.0854	4.25E-01
A0A0D9S4T8	APOA1BP	33.592	55	1.0854	9.77E-02
A0A0D9RXL9	CCT5	59.656	193	1.0851	2.45E-01
A0A0D9RIZ3	FKBP15	133.71	64	1.085	1.77E-01
A0A0D9R7R5	TP53I3	35.516	14	1.0849	1.50E-01
A0A0D9R7R1	SGPL1	63.511	27	1.0846	2.08E-01
A0A0D9RX36	RAI14	109.98	67	1.0846	5.75E-02
A0A0D9QUP1	--	22.589	45	1.0845	3.14E-02
A0A0D9RTU7	GMPR2	38.229	19	1.0845	4.82E-01
A0A0D9R217	ATG16L1	66.371	28	1.0842	2.05E-01
A0A0D9RGE3	--	50.707	69	1.0841	2.74E-03
A0A0D9S2L0	NAPA	33.232	72	1.0841	1.48E-01
A0A0D9QXZ1	COQ9	35.41	20	1.084	2.69E-01
A0A0D9R9F0	TNS1	199.44	125	1.084	1.44E-01
A0A0D9S728	RAVER2	67.59	5	1.084	6.50E-01
A0A0D9R6G7	ABT1	31.433	4	1.0838
A0A0D9RC15	LONP1	106.88	184	1.0838	3.70E-02
A0A0D9SAW4	--	12.857	32	1.0835	5.81E-01
A0A0D9RES5	STAG1	144.41	34	1.0832	4.07E-01
A0A0D9S3R9	HMBS	39.332	38	1.0832	2.24E-01
A0A0D9SDK0	SOWAHC	56.657	5	1.083
A0A0D9RYU5	LCP1	70.288	9	1.0829
A0A0D9RV86	ACTR3	47.357	131	1.0827	3.74E-02
A0A0D9S178	CMIP	74.673	8	1.0827	4.27E-01
A0A0D9RMD5	PPP1R21	88.329	34	1.0826	2.28E-03
A0A0D9RX68	--	14.395	20	1.0825	3.95E-01
A0A0D9S8I0	PLEKHM2	112.96	4	1.0825
A0A0D9R7X3	NUBP1	29.588	6	1.0824	8.87E-01
A0A0D9R2V4	NCL	50.304	131	1.0823	3.96E-01
A0A0D9QVA6	MRPS12	15.337	13	1.0821	2.59E-01
A0A0D9RDL2	UBLCP1	36.804	15	1.082	9.23E-02
A0A0D9RPJ9	PRDX4	30.531	96	1.082	4.39E-02
A0A0D9S0Z0	--	50.569	35	1.0816	1.08E-01
A0A0D9RK07	PALM	41.971	19	1.0813	3.02E-01
A0A0D9SCL9	HIST1H2AB	14.135	107	1.0809	1.37E-01
A0A0D9RP99	VPS53	94.405	25	1.0808	2.96E-01
A0A0D9RTG7	UPP1	33.882	64	1.0808	7.71E-02
A0A0D9QUJ2	PICALM	71.729	54	1.0807	1.93E-02
A0A0D9RFI6	RBP1	15.822	43	1.0807	1.61E-02
A0A0D9R4H6	TUBB2A	49.923	268	1.0806	7.84E-02
A0A0D9R246	DDB1	126.97	199	1.0802	2.33E-02
A0A0D9RNJ3	DCAF1	169.01	73	1.08	1.13E-01
A0A0D9RYW9	ARPC1B	40.892	78	1.08	9.66E-03
A0A0D9QWQ9	ENOPH1	28.951	37	1.0798	5.57E-01
A0A0D9RU14	PTPN23	178.73	90	1.0798	1.44E-01
A0A0D9QWN3	COPS4	46.268	69	1.0797	1.90E-02
A0A0D9R1X8	RPS19BP1	17.677	11	1.0794	4.32E-01
A0A0D9R7S7	CLEC16A	115.9	5	1.0794
A0A0D9REG0	MAGT1	35.481	5	1.0794	7.94E-01
A0A0D9RWC8	ERI1	40.334	9	1.0794	6.16E-01
A0A0D9RF27	NDUFA9	42.624	85	1.0791	1.72E-01
A0A0D9R7L9	--	15.972	20	1.079	1.31E-01
A0A0D9R801	DYRK1A	81.524	8	1.079	5.70E-01
A0A0D9RZH1	TRIP6	50.269	46	1.0789	1.21E-02
A0A0D9RN51	--	45.715	72	1.0787	5.02E-02
A0A0D9S2H4	WASHC4	136.36	74	1.0784	1.11E-01
A0A0D9RMZ2	PDLIM4	35.487	55	1.0783	2.25E-01
A0A0D9R7X8	--	22.957	21	1.0781	4.90E-01
A0A0D9QVL8	NFKB1	105.67	38	1.078	2.11E-01
A0A0D9R103	SMARCD1	58.262	16	1.0779	6.61E-01
A0A0D9S6V3	DDAH1	31.149	30	1.0778	4.18E-01
A0A0D9RUD1	CAPN2	79.967	133	1.0777	2.51E-02
A0A0D9RKL1	HACD3	43.159	29	1.0775	4.19E-03
A0A0D9S8M7	MTOR	288.95	111	1.0773	1.50E-04
A0A0D9RWA3	RELL1	29.373	10	1.0772	3.49E-01
A0A0D9RL05	SEPHS1	42.91	33	1.0771	2.53E-02
A0A0D9S4P7	PYCR1	33.489	75	1.0771	5.62E-02
A0A0D9R5X8	HPRT1	18.5	63	1.0768	1.45E-01
A0A0D9R1W7	TUFM	50.082	178	1.0767	2.77E-02
A0A0D9SAV6	XPNPEP1	74.893	40	1.0766	1.91E-02
A0A0D9RJC4	MAPRE1	30.031	43	1.0765	8.23E-02
A0A0D9S6I3	GSTM5	25.663	19	1.0761	6.78E-02
A0A0D9RNH4	NPTN	44.387	39	1.076	1.50E-01
A0A0D9R6T9	DNPEP	51.977	64	1.0758	1.23E-01
A0A0D9R4K3	PRPF4B	116.89	30	1.0757	4.15E-01
A0A0D9QZA6	NAT10	115.8	93	1.0754	3.30E-02
A0A0D9RR64	AAK1	98.652	13	1.0754	6.31E-01
A0A0D9RIK2	KPNA4	55.316	98	1.0752	4.90E-01
A0A0D9RZJ9	PRUNE1	50.216	33	1.0747	3.81E-01
A0A0D9S6P1	SNX7	45.334	22	1.074	4.33E-02
A0A0D9R8Y2	OPLAH	137.68	9	1.0737
A0A0D9RMD1	--	11.514	34	1.0734	6.35E-01
A0A0D9RTE8	HK2	102.32	77	1.0731	1.02E-01
A0A0D9S0P9	EFTUD2	109.45	193	1.073	1.78E-02
A0A0D9S866	LDLRAP1	35.326	6	1.0725	5.04E-01
A0A0D9RHY8	MYO1E	126.85	58	1.0724	7.16E-02
A0A0D9R1Z4	RABEP2	63.637	6	1.0723
A0A0D9RFY6	--	20.711	25	1.0723	1.97E-01
A0A0D9RV14	ECHDC1	33.899	28	1.0723	1.50E-01
A0A0D9RMR5	STXBP1	67.568	23	1.0722	2.84E-01
A0A0D9SBR9	RBM15B	97.256	9	1.0722	1.36E-01
A0A0D9QYV7	ESYT1	122.62	202	1.0721	1.39E-01
A0A0D9R3P2	RPS7	22.127	43	1.0721	6.34E-01
A0A0D9R554	POFUT2	41.397	32	1.0719	5.93E-02
A0A0D9SDT7	ZBED1	78.195	5	1.0719	6.84E-01
A0A0D9R2N3	ASNA1	38.725	52	1.0716	1.90E-01
A0A0D9RP20	PNPT1	86.009	112	1.0716	1.04E-01
A0A0D9RVB0	QDPR	25.818	39	1.0714	1.64E-01
A0A0D9RVW9	PRPF6	107.41	82	1.0714	1.06E-01
A0A0D9S7S8	TRAPPC3	20.274	16	1.0714	6.98E-01
A0A0D9RKW8	MIOS	98.574	34	1.0707	4.28E-01
A0A0D9RYT5	ESD	31.521	59	1.0706	5.97E-01
A0A0D9RAP7	SCAF4	126.32	44	1.0704	5.70E-02
A0A0D9S9G6	HNRNPA0	30.726	51	1.0704	3.19E-01
A0A0D9RXX3	EXOC3	85.573	29	1.0703	1.64E-01
A0A0D9R532	PAK1IP1	43.958	27	1.0702	4.86E-02
A0A0D9S1Q8	TOMM40	37.817	55	1.0701	3.53E-01
A0A0D9S8N0	SRM	33.824	61	1.0701	3.53E-01
A0A0D9QZC6	SFXN2	36.397	33	1.07	2.57E-01
A0A0D9RRF5	STARD3NL	26.654	7	1.07	1.62E-01
A0A0D9S8Y7	PUSL1	33.232	14	1.07	4.37E-01
A0A0D9QZW0	TRIM25	70.667	106	1.0699	1.61E-02
A0A0D9RQT5	PGGT1B	42.395	4	1.0699
A0A0D9RWZ9	TMEM33	27.978	15	1.0698	8.35E-02
A0A0D9RK09	APPL1	79.701	81	1.0696	4.29E-02
A0A0D9RYC7	SNX8	47.252	33	1.0693	1.60E-01
A0A0D9R234	C17orf75	44.872	16	1.0688	4.34E-01
A0A0D9RIH9	IFT80	86.918	8	1.0686	8.14E-01
A0A0D9QYG0	SPRYD4	23.022	4	1.0684
A0A0D9R880	MGLL	37.474	12	1.0684	1.43E-01
A0A0D9RDX7	CAMK1	41.376	28	1.0684	2.04E-01
A0A0D9R286	UBE3C	123.95	25	1.0683	4.96E-01
A0A0D9S421	DDX54	101.82	55	1.0683	3.25E-01
A0A0D9RJL7	KIF3B	85.383	27	1.0682	3.41E-01
A0A0D9RQ63	TOR1B	38.245	23	1.0682	1.55E-01
A0A0D9RXE2	PCMT1	30.317	55	1.0681	3.40E-02
A0A0D9RVM7	ARHGEF40	138.51	31	1.0679	3.67E-01
A0A0D9S208	COX4I1	19.562	38	1.0677	3.20E-01
A0A0D9RRD3	RTRAF	22.679	37	1.0676	6.30E-02
A0A0D9S052	CYB5A	15.339	37	1.0675	2.08E-01
A0A0D9RXV4	BCKDHB	43.244	14	1.0673	4.71E-01
A0A0D9RYV6	TPT1	19.48	14	1.0673	1.84E-01
A0A0D9RM83	EPCAM	34.879	23	1.0672	1.19E-01
A0A0D9RP87	BCL2L13	52.575	43	1.067	9.87E-02
A0A0D9R795	DPP3	82.709	81	1.0668	1.99E-01
A0A0D9RTN6	INTS9	73.787	21	1.0668	6.17E-01
A0A0D9RYL5	ALG11	55.632	4	1.0667	6.67E-01
A0A0D9R0V0	TNKS1BP1	182.19	177	1.0666	4.22E-02
A0A0D9RN72	AK1	23.396	27	1.0663	1.32E-01
A0A0D9RCE5	BAG5	56.042	14	1.066	5.92E-01
A0A0D9QV43	ACE	118.47	7	1.0658
A0A0D9SAV3	HPS6	83.173	8	1.0657	5.79E-01
A0A0D9RPC3	GNAI2	40.45	114	1.0656	2.04E-02
A0A0D9R678	ALDH3A2	54.652	56	1.0654	4.07E-01
A0A0D9RYM1	NPC1	142.01	36	1.0654	1.38E-01
A0A0D9R491	BAD	18.475	7	1.0653	4.69E-01
A0A0D9R7A2	ABCB6	94.052	25	1.0653	2.17E-01
A0A0D9R5Z0	VPS35L	111.25	82	1.0651	3.27E-01
A0A0D9RS73	SMYD5	47.308	39	1.065	1.15E-01
A0A0D9RKG3	TBL1XR1	55.594	21	1.0646	3.74E-01
A0A0D9RVI4	STEAP3	54.405	14	1.0643	6.44E-01
A0A0D9R9C0	ROGDI	32.255	10	1.0642	7.30E-01
A0A0D9RPT0	TMEM30A	52.577	12	1.0641	3.74E-01
A0A0D9SAH8	--	13.623	18	1.0641	6.32E-01
A0A0D9RJP8	MTFMT	42.668	7	1.064	7.92E-01
A0A0D9R9A4	ARPC2	34.333	55	1.0638	1.81E-01
A0A0D9RPI6	MYD88	34.692	11	1.0637	5.49E-01
A0A0D9QVU0	--	48.865	28	1.0636	5.53E-01
A0A0D9RDL3	DPP9	93.766	43	1.0635	3.46E-01
A0A0D9QWV1	--	42.944	38	1.0634	1.24E-02
A0A0D9S1D7	PRMT9	94.706	3	1.0634
A0A0D9R4L8	TFAM	29.391	15	1.0633	3.52E-01
A0A0D9QWW3	ABRAXAS2	42.027	8	1.0632	7.92E-01
A0A0D9RDH4	MYH10	229.02	297	1.0629	4.83E-02
A0A0D9QVX2	NQO1	28.813	40	1.0625	1.11E-01
A0A0D9S0N4	MON1B	59.236	6	1.0623	1.51E-01
A0A0D9S109	RPS19	24.338	28	1.062	5.42E-01
A0A0D9R8J7	DNAJC9	29.838	25	1.0617	1.45E-01
A0A0D9RQ57	SNX2	58.372	65	1.0617	2.06E-01
A0A0D9QYJ4	HABP2	62.676	13	1.0616	7.15E-01
A0A0D9QZQ3	TOM1L1	49.095	30	1.0616	2.35E-01
A0A0D9S4F8	PRKAB1	30.382	23	1.0615	5.61E-01
A0A0D9RCM1	CDC42BPB	146.44	95	1.0612	9.73E-02
A0A0D9R3S5	ILF3	76.528	173	1.061	4.22E-02
A0A0D9QZN3	NME2	17.284	123	1.0609	1.80E-01
A0A0D9RQE4	--	19.922	14	1.0606	6.37E-01
A0A0D9S3P3	CDK5RAP3	56.837	34	1.0606	7.63E-02
A0A0D9R3K5	MACROD1	35.486	20	1.0605	1.54E-01
A0A0D9S8N9	PGD	34.741	66	1.0602	3.91E-01
A0A0D9REI7	LSM8	10.403	25	1.0601	3.76E-01
A0A0D9R6N7	ABCC1	171.74	66	1.0596	1.19E-01
A0A0D9QYR9	KAT7	70.628	20	1.0593	5.98E-01
A0A0D9R5G0	C9orf64	39.064	45	1.0593	3.55E-01
A0A0D9QX98	MRPL58	23.705	12	1.0587	6.88E-01
A0A0D9RS41	STK39	49.426	29	1.0587	3.48E-01
A0A0D9R198	OSBP	89.254	90	1.0586	2.36E-01
A0A0D9RLG6	RAB14	23.897	75	1.0586	1.71E-01
A0A0D9RZK3	PLOD3	84.504	100	1.0586	1.53E-01
A0A0D9RKA0	POLRMT	138.14	40	1.0584	5.02E-01
A0A0D9RFW2	LAMB1	197.69	62	1.0582	4.57E-02
A0A0D9RGH2	COMMD2	22.803	20	1.0582	6.55E-01
A0A0D9RUT2	DARS	57.152	150	1.0582	9.93E-02
A0A0D9QUR2	C16orf70	47.548	7	1.0577	1.57E-01
A0A0D9RE71	DICER1	218.43	27	1.0577	3.86E-01
A0A0D9RCZ4	--	44.951	65	1.0574	1.52E-01
A0A0D9QVB4	SEC24B	132.53	67	1.0573	2.85E-01
A0A0D9RAH5	AKR1B1	47.127	165	1.0571	1.42E-01
A0A0D9RL79	CRKL	33.763	36	1.0567	2.02E-01
A0A0D9RTD7	HUS1	31.75	8	1.0566	5.15E-01
A0A0D9SB26	RAP1B	20.825	40	1.0565	5.02E-01
A0A0D9S2H0	SLC25A4	25.704	20	1.0564	2.48E-01
A0A0D9SAF6	--	18.518	105	1.0562	2.16E-01
A0A0D9RZ88	PDS5B	164.79	95	1.0557	6.50E-02
A0A0D9RAC1	DPYSL5	61.235	32	1.0554	4.14E-02
A0A0D9RIU9	RHOT2	70.376	27	1.0554	1.52E-01
A0A0D9RR39	FERMT2	58.018	66	1.0551	2.33E-01
A0A0D9R091	GOT1	46.392	81	1.055	3.43E-03
A0A0D9RVU0	--	30.185	15	1.0549	3.24E-01
A0A0D9RET3	CAPZA2	32.949	93	1.0547	2.73E-01
A0A0D9QZ89	LSM4	15.35	10	1.0544	2.81E-01
A0A0D9RBI6	INF2	134.22	91	1.0544	1.69E-01
A0A0D9RT77	PSMA7	27.897	60	1.0544	3.42E-01
A0A0D9S101	UBTF	82.605	62	1.0543	4.65E-01
A0A0D9R836	VPS26C	32.969	31	1.0541	1.84E-01
A0A0D9RC48	SAMHD1	72.288	69	1.0538	3.92E-02
A0A0D9QVH6	--	20.88	53	1.0536	4.13E-01
A0A0D9RCT5	ENO2	47.242	53	1.0536	2.82E-01
A0A0D9RMR7	--	36.34	72	1.0536	4.70E-01
A0A0D9RZT2	ANP32E	30.633	37	1.0535	6.51E-01
A0A0D9RU93	PSME2	29.043	75	1.0533	1.52E-01
A0A0D9S4H7	RPLP0	29.801	50	1.0531	3.32E-01
A0A0D9S7W3	KIAA1522	113.25	29	1.053	4.14E-01
A0A0D9RD14	DYNC1H1	467.51	877	1.0528	2.82E-02
A0A0D9R3A1	EARS2	58.56	34	1.0527	5.08E-01
A0A0D9RN77	PPP2R5E	51.446	23	1.0524	4.91E-01
A0A0D9QXT4	KATNB1	72.293	16	1.0523	3.47E-01
A0A0D9S8E1	AKR7L	36.886	40	1.0514	2.54E-01
A0A0D9S2G5	SAE1	34.378	57	1.0513	2.94E-01
A0A0D9SDP0	--	17.076	67	1.0511	4.38E-01
A0A0D9RV19	PDLIM2	37.419	6	1.051	7.46E-01
A0A0D9S825	WASF2	54.269	21	1.051	4.54E-01
A0A0D9R6C5	--	102.48	50	1.0509	2.30E-01
A0A0D9R738	LLGL1	115.37	29	1.0508	5.71E-01
A0A0D9REV2	NCBP1	91.838	125	1.0507	3.31E-01
A0A0D9RAF8	PPFIA1	143.06	48	1.0506	1.29E-01
A0A0D9R5C0	NBAS	269.08	26	1.0505	5.65E-01
A0A0D9SAE8	--	33.568	31	1.0503	8.39E-02
A0A0D9RQI8	EXOSC2	32.747	31	1.0501	4.07E-01
A0A0D9RV44	HELZ2	314.34	11	1.0499	6.94E-01
A0A0D9SCL5	--	13.906	112	1.0497	3.78E-01
A0A0D9RPZ5	EIF1AX	16.46	22	1.0496	1.33E-01
A0A0D9RZL5	IFT22	20.866	15	1.0495	2.39E-01
A0A0D9R2R0	EML3	95.303	43	1.0492	2.08E-01
A0A0D9RTF2	PMPCA	58.246	65	1.0492	6.00E-01
A0A0D9RQB6	WDR48	76.21	17	1.0489	4.43E-01
A0A0D9S7Y6	PEF1	30.295	8	1.0485	7.03E-01
A0A0D9RA21	NR2C2	68.993	9	1.0481	6.61E-01
A0A0D9RAD8	PPIF	21.949	12	1.0479	6.33E-01
A0A0D9R7B6	AIFM2	40.597	8	1.0477	6.92E-01
A0A0D9S2T3	CORO1C	54.284	45	1.0476	3.03E-01
A0A0D9RIN2	TPM1	32.837	76	1.0475	2.23E-01
A0A0D9S7S2	OSCP1	44.707	8	1.0475	7.87E-01
A0A0D9RJN5	NCKAP1	128.79	119	1.0474	1.08E-01
A0A0D9RRG2	PYGL	97.142	197	1.0474	8.18E-02
A0A0D9RIZ2	ACBD6	31.11	31	1.0473	2.73E-01
A0A0D9RSN1	UQCRC1	50.434	134	1.0473	5.16E-01
A0A0D9RBE4	CAD	243.15	267	1.0471	1.34E-01
A0A0D9S5Y0	POLR3C	60.627	16	1.0471	6.82E-01
A0A0D9QZE7	APIP	27.165	19	1.0469	6.66E-01
A0A0D9RVF7	NDOR1	67.007	13	1.0468	8.63E-01
A0A0D9RJN6	VPS50	111.2	47	1.0467	3.82E-01
A0A0D9RQR8	PRKDC	469.68	749	1.0466	5.13E-02
A0A0D9QWR9	DDX19B	53.94	52	1.0464	3.81E-01
A0A0D9R4N6	SH3BP1	76.4	6	1.0463	7.35E-01
A0A0D9S9S8	TLR2	89.994	11	1.0463	6.14E-01
A0A0D9RNX3	--	37.429	114	1.0461	5.20E-02
A0A0D9S1Y5	VASP	39.77	49	1.0459	2.86E-02
A0A0D9RP53	GLOD4	33.214	59	1.0458	1.86E-01
A0A0D9S501	LAMTOR2	13.507	8	1.0457	7.12E-01
A0A0D9RVS2	TPD52L2	20.382	20	1.0452	5.14E-01
A0A0D9RQ93	LGALS3	26.106	66	1.0451	1.71E-01
A0A0D9R3J3	TIMM29	29.066	16	1.0449	5.68E-01
A0A0D9S3R2	ALDH16A1	85.133	25	1.0446	5.91E-01
A0A0D9RGU1	SEL1L	88.726	37	1.0445	6.64E-01
A0A0D9REP0	PGP	34.105	33	1.0444	3.26E-01
A0A0D9QX45	TSFM	35.35	16	1.0443	4.17E-01
A0A0D9RCM7	HACL1	64.381	8	1.0443	5.42E-01
A0A0D9REA9	ABCA3	142.19	5	1.0443	4.79E-01
A0A0D9RQG8	PREP	80.765	139	1.0443	6.58E-03
A0A0D9QVU3	PDF	26.931	11	1.0442	2.44E-01
A0A0D9RNM3	--	22.423	50	1.0442	4.14E-01
A0A0D9S4W0	--	60.519	30	1.0442	4.87E-01
A0A0D9R300	--	88.273	91	1.0439	3.52E-01
A0A0D9RYR3	ATP6AP1	52.615	15	1.0439	8.34E-01
A0A0D9REM0	SNRPB	23.656	45	1.0438	4.61E-01
A0A0D9RED4	MRPL22	23.658	14	1.0437	4.93E-01
A0A0D9RL93	DCUN1D1	30.124	24	1.0436	4.68E-01
A0A0D9S3M4	BRAP	53.714	11	1.043	7.75E-01
A0A0D9RGG3	CNPY3	30.672	24	1.0429	1.34E-01
A0A0D9S618	U2AF2	53.12	65	1.0427	2.99E-01
A0A0D9R8Z8	COPG1	97.391	151	1.0424	2.43E-02
A0A0D9RJ64	TXNDC17	13.942	31	1.0423	4.04E-01
A0A0D9RRV9	DALRD3	59.755	4	1.0419	4.23E-01
A0A0D9QZF2	PDHX	54.082	25	1.0417	3.04E-01
A0A0D9QVJ0	ACTN4	104.85	250	1.0416	1.38E-01
A0A0D9RWH7	PRKAA1	57.921	53	1.0416	2.33E-01
A0A0D9RYH0	USP14	55.972	72	1.0416	5.54E-02
A0A0D9RX16	GUF1	73.856	9	1.0414	8.47E-01
A0A0D9RIM7	SRSF7	27.37	31	1.0412	6.73E-01
A0A0D9RTD5	ADRM1	42.167	29	1.041	5.20E-01
A0A0D9QWR4	HNRNPD	38.434	49	1.0407	4.63E-01
A0A0D9QUI2	HIKESHI	21.627	10	1.0406	3.31E-01
A0A0D9RAT9	SFXN1	35.646	25	1.0406	6.67E-01
A0A0D9RNJ2	INPP5K	51.22	5	1.0403
A0A0D9R0J1	ZC3H7B	108.01	8	1.0402	7.27E-01
A0A0D9R107	CLP1	47.645	9	1.0402	8.52E-01
A0A0D9RLG0	NUDT5	20.851	30	1.0402	1.15E-01
A0A0D9R9E0	PYCR3	29.947	44	1.04	3.21E-01
A0A0D9RSD5	FAM169A	80.713	44	1.04	6.81E-01
A0A0D9R8L7	RAB10	22.541	39	1.0399	2.18E-01
A0A0D9R561	ADARB1	76.712	15	1.0397	7.61E-01
A0A0D9RNB6	GPNMB	62.492	41	1.0396	7.66E-01
A0A0D9R9M7	MRPL21	23.194	29	1.0394	4.97E-01
A0A0D9RLI2	--	42.754	25	1.0393	6.77E-01
A0A0D9R0C7	EPS15L1	101.3	56	1.0392	4.59E-01
A0A0D9RY35	SEH1L	46.559	45	1.0392	3.69E-01
A0A0D9RIT4	YIPF5	27.976	12	1.039	5.69E-01
A0A0D9RX15	BRIX1	41.456	46	1.0386	6.63E-01
A0A0D9S1D9	--	45.407	29	1.0385	1.69E-01
A0A0D9SAY1	--	11.549	8	1.0383	4.99E-01
A0A0D9R1G6	ILVBL	67.893	49	1.0382	1.43E-01
A0A0D9RGH8	TTC8	58.402	14	1.038	4.10E-01
A0A0D9QVL6	MANBA	100.92	35	1.0377	1.75E-01
A0A0D9R632	SUPV3L1	88.094	98	1.0375	1.52E-01
A0A0D9R8E8	RAB7A	23.489	51	1.0374	5.19E-01
A0A0D9S2J5	POGLUT3	58.467	86	1.0374	2.34E-01
A0A0D9S7Q2	UTP11	30.474	16	1.0372	6.10E-01
A0A0D9R8L1	PMM2	28.038	23	1.0371	5.35E-01
A0A0D9RJ83	DIAPH1	138.44	72	1.0371	4.09E-01
A0A0D9RJ96	PDCD10	24.715	39	1.0367	6.83E-01
A0A0D9RQJ4	ELMO2	82.642	35	1.0367	1.07E-01
A0A0D9RWH2	ENTPD3	59.65	7	1.0365	7.56E-01
A0A0D9RDM6	--	43.797	5	1.0364	5.50E-01
A0A0D9QXW2	UQCRFS1	29.78	52	1.0361	1.75E-01
A0A0D9R381	TWF1	43.988	46	1.036	4.35E-01
A0A0D9QY11	ARL2BP	18.834	21	1.0359	4.80E-01
A0A0D9R3H0	SPINDOC	33.962	11	1.0351	7.54E-01
A0A0D9RDS4	TLN1	271.45	603	1.0351	1.13E-01
A0A0D9RQJ2	IDH3A	39.637	52	1.0351	2.17E-01
A0A0D9RNN8	--	23.519	49	1.035	9.54E-02
A0A0D9RR27	APEH	83.778	27	1.0349	6.33E-01
A0A0D9RNC3	LAD1	58.269	25	1.0348	5.15E-01
A0A0D9RZX8	POR	76.957	110	1.0348	4.89E-01
A0A0D9QVL4	CISD2	15.279	22	1.0347	2.52E-01
A0A0D9R1R2	TMEM109	26.133	7	1.0347	6.48E-01
A0A0D9RND8	ARFGEF1	208.8	55	1.0347	4.59E-01
A0A0D9QVD0	ECH1	35.022	27	1.0346	6.06E-01
A0A0D9RPB2	ULK3	53.634	16	1.0346	8.48E-01
A0A0D9R1V5	MYOF	232.11	252	1.0343	4.68E-03
A0A0D9RDN2	NOP58	52.399	115	1.0343	2.66E-01
A0A0D9RS97	--	25.898	75	1.0342	5.47E-01
A0A0D9S647	ATP1A1	112.91	163	1.0341	2.81E-01
A0A0D9RG29	BCAP29	28.347	12	1.034	4.19E-01
A0A0D9S2X7	--	69.094	47	1.034	4.45E-01
A0A0D9RE00	ABCB10	78.851	18	1.0339	4.81E-01
A0A0D9RRR2	SSB	51.831	99	1.0339	3.18E-01
A0A0D9REP7	EEF2	95.323	338	1.0338	7.23E-02
A0A0D9S590	MTX1	51.684	37	1.0338	5.47E-01
A0A0D9R9Y5	CCT8	59.516	192	1.0337	2.62E-01
A0A0D9RPB3	ASPH	84.985	41	1.0335	4.99E-01
A0A0D9QWB2	PKD2	98.236	21	1.0331	2.84E-01
A0A0D9RGA7	NRDE2	132.69	7	1.0327
A0A0D9RTY6	--	68.86	12	1.0325	7.51E-01
A0A0D9R0F3	XRCC6	69.84	242	1.0324	2.83E-01
A0A0D9RQW4	CRABP1	15.565	22	1.0324	5.02E-01
A0A0D9QZ73	--	13.744	21	1.0323	4.99E-01
A0A0D9QUU6	ATP2B1	129.51	125	1.0321	3.87E-01
A0A0D9R3Q2	DNM2	99.353	91	1.0321	1.16E-01
A0A0D9RY55	DOCK9	242.05	31	1.032	7.46E-01
A0A0D9S436	TBC1D17	72.734	7	1.0319	8.38E-01
A0A0D9RHK3	SCAMP4	25.602	4	1.0318	1.85E-01
A0A0D9QW77	IST1	39.676	28	1.0317	7.59E-01
A0A0D9S3Y2	PTPN11	68.427	89	1.0317	6.74E-01
A0A0D9RP43	ARMT1	51.249	59	1.0316	4.15E-01
A0A0D9R8C7	BORCS5	22.22	4	1.0314
A0A0D9RQQ8	AVL9	71.86	11	1.0313	8.45E-01
A0A0D9QUW3	TMTC3	104.01	39	1.0311	4.41E-01
A0A0D9RVM1	DHX15	90.902	139	1.0311	1.93E-01
A0A0D9S6F7	RAP1A	20.987	25	1.0311	7.25E-01
A0A0D9RY29	RNMT	55.032	48	1.031	4.19E-01
A0A0D9S024	RFC2	38.961	19	1.031	7.81E-01
A0A0D9S8N2	--	44.712	49	1.0306	6.22E-01
A0A0D9RHH6	GNAI1	40.361	17	1.0305	5.51E-01
A0A0D9RQZ8	REEP5	21.493	13	1.0301	8.24E-01
A0A0D9RF94	ATP1B1	35.001	18	1.0297	5.87E-01
A0A0D9R8G3	ZC3HAV1L	32.723	85	1.0296	3.16E-01
A0A0D9S3D8	NDUFS2	52.52	63	1.0295	4.67E-01
A0A0D9QZ33	SLK	142.76	52	1.0292	6.00E-01
A0A0D9RPC6	MPI	46.244	46	1.0291	6.35E-01
A0A0D9RR53	GFPT1	76.778	189	1.0287	4.32E-01
A0A0D9RX76	ZFR	117.05	55	1.0287	1.83E-01
A0A0D9R6L1	HNRNPM	73.474	120	1.0285	2.80E-01
A0A0D9QUZ2	AAMDC	13.332	7	1.0283
A0A0D9RWZ0	--	70.587	21	1.0281	5.38E-01
A0A0D9QWH4	SF3B3	135.55	146	1.028	3.29E-01
A0A0D9R0K9	--	43.23	61	1.028	4.12E-01
A0A0D9RVK4	HNRNPC	32.337	79	1.028	1.94E-01
A0A0D9R2K6	CYFIP1	145.15	137	1.0278	4.01E-01
A0A0D9S212	NT5DC3	63.314	34	1.0277	6.80E-01
A0A0D9S3K2	KPNB1	97.169	250	1.0277	1.94E-01
A0A0D9R890	--	180.33	4	1.0273
A0A0D9RQR4	RTN4IP1	43.683	8	1.027	7.98E-01
A0A0D9R8L3	NDUFV1	50.629	84	1.0269	2.28E-01
A0A0D9RAS8	URB1	254.97	87	1.0269	6.49E-01
A0A0D9RFC8	ERP44	47.012	75	1.0267	2.13E-01
A0A0D9RAZ3	HSD17B8	26.537	15	1.0266	7.95E-01
A0A0D9RC97	PITPNB	30.72	51	1.0266	6.79E-01
A0A0D9RQR3	TMED7	25.143	45	1.0262	4.98E-01
A0A0D9R0G0	PTPMT1	22.755	11	1.0261	7.60E-01
A0A0D9RFX6	RIC8A	59.532	70	1.026	6.69E-01
A0A0D9RXT2	FAHD2A	34.556	37	1.026	5.83E-01
A0A0D9QVJ2	OSBPL8	105.37	27	1.0259	6.94E-01
A0A0D9R4D4	SERPINB9	42.24	10	1.0258	8.66E-01
A0A0D9S8E0	--	39.804	37	1.0254	4.42E-01
A0A0D9RI07	--	32.034	414	1.0248	3.78E-01
A0A0D9S2I4	C12orf75	6.422	14	1.0247	7.00E-01
A0A0D9S0T1	LTA4H	69.36	99	1.0246	4.59E-01
A0A0D9RD23	TSNAX	33.098	41	1.0245	1.71E-01
A0A0D9S2R8	SART3	109.81	101	1.0243	4.24E-01
A0A0D9S754	OMA1	60.189	11	1.0243	7.97E-01
A0A0D9R328	G6PD	59.253	226	1.0242	4.91E-01
A0A0D9S6L4	SLC25A24	28.356	31	1.0242	5.92E-01
A0A0D9QV00	SUPT5H	121.03	84	1.0241	3.99E-01
A0A0D9R1H7	PPP4C	35.08	27	1.0241	6.97E-01
A0A0D9SAC9	--	7.6848	7	1.024	2.91E-01
A0A0D9R3I9	PLXNB3	207.01	3	1.0239
A0A0D9RJ67	ALAD	37.166	18	1.0239	7.42E-01
A0A0D9RF24	ANXA6	76.312	140	1.0236	1.71E-01
A0A0D9S5T7	POGZ	155.24	20	1.0235	4.38E-01
A0A0D9RC21	--	69.506	84	1.0233	6.31E-01
A0A0D9QVK4	BDH2	25.193	20	1.0231	4.84E-01
A0A0D9RTV0	AIDA	35.023	31	1.0229	5.96E-01
A0A0D9RAP1	CHCHD4	16.039	27	1.0228	6.29E-01
A0A0D9S6F2	UBE2M	20.9	20	1.0228	6.58E-01
A0A0D9R7R9	PCBD1	11.999	31	1.0226	8.38E-01
A0A0D9S372	ORMDL3	17.48	7	1.0226
A0A0D9QUQ1	EEA1	162.54	167	1.0225	4.15E-01
A0A0D9RB86	NF2	69.089	22	1.0224	7.17E-01
A0A0D9SDU3	RAB9A	22.823	24	1.0224	6.05E-01
A0A0D9S0Q8	SNRPF	13.794	28	1.0222	5.94E-01
A0A0D9QW62	RHOG	21.294	40	1.0221	5.56E-01
A0A0D9RUE3	EMC9	23.062	5	1.0219
A0A0D9R732	TIMM44	47.395	50	1.0217	5.47E-01
A0A0D9S9M0	--	41.722	877	1.0217	4.46E-01
A0A0D9RA00	CALD1	62.621	32	1.0212	6.23E-01
A0A0D9SBU2	H1FX	22.531	32	1.0211	4.75E-01
A0A0D9RH64	PTPN3	105.42	26	1.021	6.66E-01
A0A0D9RYX5	IMPACT	36.451	10	1.0208	8.71E-01
A0A0D9RV97	DHX29	154.97	72	1.0206	2.42E-01
A0A0D9SDL0	PCBP1	37.497	101	1.0206	4.06E-01
A0A0D9R447	GSK3B	48.033	32	1.0205	7.41E-01
A0A0D9RL59	FXR1	73.128	91	1.0205	3.57E-01
A0A0D9R7Z3	PSAP	58.194	88	1.0204	8.67E-01
A0A0D9RHH0	GSS	52.418	39	1.0203	6.53E-01
A0A0D9S800	MECR	40.413	36	1.02	6.38E-01
A0A0D9QYR0	CNPY2	20.679	49	1.0198	7.70E-01
A0A0D9RQ73	CCT4	57.922	154	1.0195	3.79E-01
A0A0D9RZ17	COPS6	36.445	60	1.0195	4.15E-01
A0A0D9SEF0	--	21.634	36	1.0193	8.03E-01
A0A0D9RYF4	YES1	60.758	29	1.0191	5.00E-01
A0A0D9RZN6	ENSA	13.389	17	1.0191	6.87E-01
A0A0D9S5T8	PSMB4	29.174	38	1.019	6.77E-01
A0A0D9RX52	MAP4K4	157.56	37	1.0186	6.48E-01
A0A0D9S6J3	PSMA5	26.411	57	1.0186	1.58E-01
A0A0D9RD57	CADPS2	121.44	3	1.0185	7.63E-01
A0A0D9RM50	ANP32A	29.317	54	1.0184	4.85E-01
A0A0D9RGB0	RINT1	90.901	7	1.0182	8.32E-01
A0A0D9RIC6	--	16.743	14	1.0181	7.80E-01
A0A0D9R3M7	EIPR1	43.573	36	1.0179	7.10E-01
A0A0D9REX7	MRPL54	15.86	11	1.0176	8.98E-01
A0A0D9RKM8	SYNJ2BP	13.667	11	1.0176	5.78E-01
A0A0D9QV99	PSMC5	45.626	122	1.0175	4.31E-01
A0A0D9RDE8	FAM91A1	94.058	29	1.0175	6.40E-01
A0A0D9RD24	STK38	54.19	15	1.0173	7.83E-01
A0A0D9RWF6	SMPD4	84.136	52	1.0173	5.23E-01
A0A0D9QVX3	INPPL1	138.57	22	1.0172	8.36E-01
A0A0D9S207	EMC8	23.773	27	1.0171	7.14E-01
A0A0D9R2U5	NF1	320.51	56	1.017	7.34E-01
A0A0D9RK54	ZFYVE1	87.059	9	1.0168	9.93E-01
A0A0D9R0N1	MMS19	113.31	104	1.0166	7.20E-01
A0A0D9R8T1	PDLIM7	46.567	83	1.0166	5.55E-01
A0A0D9S897	HNRNPR	54.062	117	1.0165	4.77E-01
A0A0D9RFL8	TBL3	89.143	96	1.0163	5.87E-01
A0A0D9S8N5	PEX14	41.252	8	1.0163	7.71E-01
A0A0D9QUR7	TRADD	33.857	15	1.0162	3.81E-01
A0A0D9RBF7	MLLT1	61.687	9	1.0162	8.94E-01
A0A0D9RSS1	SRP54	55.704	41	1.0162	7.88E-01
A0A0D9R493	UQCRC2	48.523	97	1.0161	4.07E-01
A0A0D9RB33	TAPBP	54.339	10	1.0158	7.88E-01
A0A0D9RRG7	PTPN1	49.978	49	1.0158	7.10E-01
A0A0D9SBK5	TRMT10C	47.42	61	1.0158	6.31E-01
A0A0D9RGZ2	--	237.54	91	1.0157	5.03E-01
A0A0D9S1Z5	SNRPD2	13.527	20	1.0156	7.83E-01
A0A0D9RFE8	LCLAT1	44.563	15	1.0154	7.48E-01
A0A0D9RY95	PPP4R1	105.02	59	1.0154	7.74E-01
A0A0D9RHW4	HEATR5B	233.43	15	1.0153	8.47E-01
A0A0D9R8N8	MELTF	79.965	7	1.015
A0A0D9S0V0	GCSH	19.089	7	1.015	9.79E-01
A0A0D9S458	PGS1	62.089	6	1.015	9.39E-01
A0A0D9S5N9	S100A4	11.728	6	1.0149	7.35E-01
A0A0D9S3P5	COPA	138.34	315	1.0148	5.88E-01
A0A0D9RMR2	FAM129B	84.115	87	1.0147	7.88E-01
A0A0D9R066	PACSIN3	48.486	20	1.0145	7.51E-01
A0A0D9RSX4	MRPS27	48.061	58	1.0145	5.85E-01
A0A0D9RVR7	METTL17	42.722	4	1.0145
A0A0D9RAJ5	ANXA11	54.335	80	1.0143	7.71E-01
A0A0D9QZ12	TCP11L1	56.931	23	1.0142	7.89E-01
A0A0D9QW67	TBCB	27.334	23	1.014	8.80E-01
A0A0D9QWX1	MON2	189.75	23	1.014	9.97E-01
A0A0D9S634	WDR3	106.24	89	1.014	3.73E-01
A0A0D9R4K9	PDIA6	48.059	101	1.0139	5.14E-01
A0A0D9RBY1	TIMM8A	10.998	14	1.0139	7.23E-01
A0A0D9RSA6	COL4A3BP	70.823	23	1.0139	8.28E-01
A0A0D9QUY3	--	14.191	5	1.0138
A0A0D9S2G9	ACAT1	45.383	48	1.0138	7.64E-01
A0A0D9RJ45	PIP4K2A	46.224	7	1.0137	8.61E-01
A0A0D9RVB6	DPP7	54.244	40	1.0137	7.55E-01
A0A0D9SBC7	TMEM177	33.845	36	1.0137	8.31E-01
A0A0D9RLK7	--	28.262	37	1.0134	8.32E-01
A0A0D9RN92	RRP9	51.685	34	1.0133	8.21E-01
A0A0D9RYA7	MTCL1	183.45	17	1.0133	8.44E-01
A0A0D9RAE4	AKT3	55.056	7	1.013	9.28E-01
A0A0D9S8Q7	ENO1	47.271	371	1.013	4.10E-01
A0A0D9QZ14	DGKA	82.839	85	1.0129	6.71E-01
A0A0D9RGL9	TCOF1	156.34	33	1.0129	8.93E-01
A0A0D9S1A7	PANX1	47.908	2	1.0129
A0A0D9S8S9	ACOT7	36.597	46	1.0129	7.80E-01
A0A0D9RR45	WDR36	102.21	57	1.0127	4.67E-01
A0A0D9RB77	GPD1L	38.386	17	1.0125	7.45E-01
A0A0D9RD34	STOML2	38.588	46	1.0123	7.66E-01
A0A0D9RCR5	RARS	75.345	174	1.0119	4.22E-01
A0A0D9RA63	PSIP1	60.149	53	1.0116	3.51E-01
A0A0D9S3X4	SCAF1	139	9	1.0116	9.26E-01
A0A0D9RRN4	L2HGDH	50.33	35	1.0114	7.13E-01
A0A0D9RAY1	FH	54.668	76	1.0109	5.21E-01
A0A0D9R9M4	SMARCAL1	105.33	22	1.0106	8.14E-01
A0A0D9RGD1	EIF4A1	46.153	151	1.0106	5.45E-01
A0A0D9RIS4	RAB8B	23.584	11	1.0105	8.42E-01
A0A0D9RQ38	XPO1	123.38	254	1.0103	7.19E-01
A0A0D9R0F0	PSMC3	29.507	66	1.0099	8.23E-01
A0A0D9RUQ5	IMMT	79.309	99	1.0099	8.28E-01
A0A0D9RI92	TMED10	24.968	66	1.0095	7.31E-01
A0A0D9QXD0	WDR11	136.66	42	1.0094	5.52E-01
A0A0D9RPD6	COX5A	16.685	19	1.0094	8.59E-01
A0A0D9QZ46	ATXN10	53.476	71	1.0093	6.24E-01
A0A0D9RJ85	GLUL	42.064	32	1.0092	8.12E-01
A0A0D9QV01	PAK1	60.521	10	1.009	9.35E-01
A0A0D9R435	GXYLT1	50.555	6	1.0089	8.77E-01
A0A0D9QUN2	PCF11	173.06	47	1.0087	7.84E-01
A0A0D9RFP7	NDUFB10	21.326	35	1.0087	8.03E-01
A0A0D9R9Q4	XRCC5	82.715	179	1.0086	5.12E-01
A0A0D9QXJ5	CASKIN2	126.64	5	1.0085	8.98E-01
A0A0D9RGW0	ERC1	128.51	104	1.0084	7.21E-01
A0A0D9R6A9	MAPK7	88.339	9	1.0081	9.28E-01
A0A0D9RE78	SNTB1	58.248	23	1.0078	9.43E-01
A0A0D9RLM0	PTPRA	99.096	19	1.0075	8.77E-01
A0A0D9S175	OTUD4	123.92	25	1.0075	8.26E-01
A0A0D9RXG7	MAP3K7	67.195	7	1.0073	9.43E-01
A0A0D9S365	MMAB	27.053	14	1.0072	9.54E-01
A0A0D9QW08	LAMTOR1	17.745	30	1.0071	8.90E-01
A0A0D9RJV9	EZR	69.276	113	1.0071	8.12E-01
A0A0D9RAF7	--	96.063	145	1.0069	8.18E-01
A0A0D9QVG5	GSTCD	71.144	22	1.0066	8.77E-01
A0A0D9R8G5	CYP27A1	60.299	36	1.0066	9.35E-01
A0A0D9S2Q6	APRT	22.532	14	1.0066	8.85E-01
A0A0D9SAI8	--	67.119	10	1.0066	8.87E-01
A0A0D9RMU2	TWF2	39.539	79	1.0063	8.70E-01
A0A0D9RU66	--	100.69	18	1.0063	8.82E-01
A0A0D9R4X2	DNM1L	83.398	210	1.0062	7.60E-01
A0A0D9RVV5	ATP6V1B2	59.432	107	1.0062	8.57E-01
A0A0D9RTL1	KIF13B	202.63	103	1.0057	8.08E-01
A0A0D9RB71	SH3PXD2B	101.22	32	1.0056	9.29E-01
A0A0D9S700	--	38.553	24	1.0056	9.48E-01
A0A0D9QZU0	HIF1AN	40.285	19	1.0054	9.75E-01
A0A0D9RDK0	PIK3R4	153.14	53	1.0054	8.95E-01
A0A0D9RQQ1	AP3S1	18.771	21	1.0053	9.26E-01
A0A0D9S3Y0	PRMT1	35.386	71	1.0052	8.86E-01
A0A0D9RTV9	CCDC25	23.392	18	1.005	9.10E-01
A0A0D9RNF7	CSRP1	20.583	110	1.0048	9.56E-01
A0A0D9RXZ5	MYO6	145.9	99	1.0048	8.49E-01
A0A0D9RC37	--	24.927	16	1.0046	8.77E-01
A0A0D9RQ20	KTN1	153.08	237	1.0046	6.79E-01
A0A0D9R9T7	TP53BP1	214.27	176	1.0045	8.72E-01
A0A0D9RY23	TEX30	25.619	10	1.0044	7.91E-01
A0A0D9S3T6	RPS11	18.431	40	1.0044	9.14E-01
A0A0D9RDV2	--	100.18	17	1.0043	9.45E-01
A0A0D9S558	--	46.565	8	1.0042	9.08E-01
[truncated: 3,877 more rows]

## Sheet: Up-regulated proteins
Protein accession	Gene name	MW [kDa]	MS/MS Counts	Infected / Mock Ratio	Infected / Mock P value
A0A0D9SCL0	--	15.404	24	6.4178	0.00671
A0A0D9RIK3	ATP5F1D	17.431	26	5.6239	0.00306
A0A0D9RW39	HMGCS1	57.35	13	4.8763	0.013
A0A0D9SD49	H1F0	20.893	24	4.4418	0.000289
A0A0D9R642	HKDC1	102.53	119	4.3185	1.37e-06
A0A0D9S455	VWA5A	77.454	11	4.2194	0.000404
A0A0D9R6N1	SLC41A3	52.488	16	4.1152	0.0161
A0A0D9RTJ6	CENPH	23.018	6	3.9764	0.0296
A0A0D9S5P1	S100A6	10.18	13	3.9341	0.0283
A0A0D9QZ60	METTL7B	27.772	7	2.9879	0.000223
A0A0D9QVF1	PSMB10	28.941	20	2.961	1.09e-05
A0A0D9R8J6	DDAH2	29.716	13	2.8781	0.0436
A0A0D9S5J3	--	27.641	11	2.636	0.0252
A0A0D9RIJ2	CIRBP	18.648	21	2.6252	0.00113
A0A0D9S8F1	ARHGEF10L	139.89	10	2.5999	0.00985
A0A0D9RFU2	SIRT3	43.79	9	2.5933	0.015
A0A0D9SC08	--	34.214	11	2.5165	0.0417
A0A0D9RSR4	IFIH1	116.6	14	2.4663	0.00797
A0A0D9S6T5	--	67.198	16	2.4503	0.0011
A0A0D9S944	--	19.762	11	2.4403	0.0013
A0A0D9R5R7	ITPR2	308.12	12	2.4125	0.00267
A0A0D9RD33	SRSF3	19.308	6	2.3985	0.0172
A0A0D9RAD3	C3	187.05	29	2.3879	1.95e-05
A0A0D9REV3	CAV2	18.251	25	2.3668	2.11e-05
A0A0D9R7W9	--	134.22	14	2.3308	7.57e-05
A0A0D9RE90	MTMR14	72.251	9	2.317	0.0466
A0A0D9R541	--	121.89	14	2.309	0.000164
A0A0D9R0T9	SLC11A2	62.28	6	2.3026	0.00461
A0A0D9QZV9	TP53I11	21.026	10	2.2637	0.0142
A0A0D9RAN5	PSMB9	23.247	21	2.2327	0.0112
A0A0D9S197	HSD17B2	42.742	19	2.2251	3.34e-05
A0A0D9R3F1	LDLR	84.362	9	2.2211	0.019
A0A0D9SE17	--	14.453	12	2.1957	0.00428
A0A0D9RXD9	SEC11A	17.407	12	2.1407	3.84e-05
A0A0D9RUR3	DAD1	12.497	18	2.1351	0.000941
A0A0D9RMS4	NDUFB11	25.04	11	2.1307	0.0178
A0A0D9RGL7	PGAP1	105.1	30	2.0676	0.00192
A0A0D9REU9	CAV1	20.471	24	2.0633	0.0137
A0A0D9RVR3	ITGA2	129.63	101	2.0595	0.00102
A0A0D9RBA7	ITPR3	304.01	76	2.054	8.15e-06
A0A0D9QUT3	AKT2	61.368	17	2.0512	0.00581
A0A0D9QV58	ACSS3	74.757	45	2.0306	0.00318
A0A0D9R3T5	METTL9	36.602	16	2.0241	0.00151
A0A0D9RJI9	--	24.67	195	2.0205	0.000457
A0A0D9S329	DHDH	36.374	10	2.0129	0.00597
A0A0D9RXR3	CLPTM1L	64.986	13	2.0103	0.000961

## Sheet: Down-regulated proteins
Protein accession	Gene name	MW [kDa]	MS/MS Counts	Infected / Mock Ratio	Infected / Mock P value
A0A0D9RGK3	SRPK2	79.258	12	0.4998	0.000114
A0A0D9RKM7	MFN1	84.029	14	0.4995	0.00114
A0A0D9S007	BUD23	31.909	11	0.4983	0.0041
A0A0D9RBW7	TMEM209	62.911	11	0.4981	0.0301
A0A0D9REE5	DSCC1	45.403	5	0.497	0.0125
A0A0D9RDS1	ATAD2	158.1	15	0.4923	0.000467
A0A0D9QZC2	ITGA5	119.28	25	0.4879	0.000429
A0A0D9RZQ6	SKA1	29.415	7	0.4857	0.00902
A0A0D9RU64	EDF1	16.368	20	0.4843	0.000673
A0A0D9R5K0	NUP153	153.65	46	0.4838	0.000131
A0A0D9QYH8	GATAD2A	68.024	11	0.4833	0.00793
A0A0D9R1U7	ALCAM	67.257	39	0.482	4.75e-05
A0A0D9R5K9	--	29.234	12	0.482	0.00125
A0A0D9S8X3	SSU72	22.574	12	0.482	0.0299
A0A0D9R1C3	SYNRG	147.11	14	0.4798	0.0013
A0A0D9S129	UHRF1BP1L	164.14	19	0.4792	0.00068
A0A0D9RLD7	TFB1M	39.632	12	0.4784	0.0314
A0A0D9RLC1	RBM3	17.17	13	0.4772	3.32e-06
A0A0D9REA1	HAVCR1	39.073	21	0.4734	0.000355
A0A0D9RDU6	CHAF1A	105.18	15	0.4704	0.0109
A0A0D9RWK4	TNFAIP3	89.541	11	0.469	0.0054
A0A0D9RAG0	HAUS6	108.86	20	0.4684	0.00153
A0A0D9RT90	QSOX2	65.026	43	0.4679	0.000749
A0A0D9RL86	--	24.262	70	0.4678	3.65e-06
A0A0D9R4U4	CDC42EP1	39.016	18	0.4652	0.000271
A0A0D9RWW0	ADGRG6	136.6	20	0.4636	0.0115
A0A0D9RT44	TAF4	88.905	7	0.4635	0.000159
A0A0D9RH85	ESF1	98.243	12	0.4583	0.00121
A0A0D9RN29	SDHAF4	12.07	4	0.4568	0.00183
A0A0D9RQS0	PRRC2B	242.66	19	0.4566	0.00773
A0A0D9R8W2	GPAA1	67.631	12	0.4504	0.0345
A0A0D9RLW6	TXNDC15	38.699	8	0.4478	0.0056
A0A0D9R9V0	TFB2M	44.953	15	0.4465	0.0294
A0A0D9R657	LTBP3	138.66	19	0.4458	0.00115
A0A0D9RUT3	ARFGAP1	45.726	20	0.4427	0.0011
A0A0D9S5U0	RFX5	66.002	9	0.4424	0.00118
A0A0D9R3X7	TIMMDC1	32.108	14	0.4395	0.00676
A0A0D9RGZ8	TAFA4	15.158	11	0.4374	0.00043
A0A0D9R9M8	MGRN1	60.872	9	0.437	0.0203
A0A0D9RJ24	MTERF3	47.51	10	0.4369	0.00485
A0A0D9RPF4	EFEMP1	54.547	9	0.4346	0.000748
A0A0D9RJC5	AKAP9	454.37	43	0.4325	0.000258
A0A0D9QX84	ATE1	46.744	12	0.4309	0.00327
A0A0D9S805	YTHDF2	62.333	25	0.4267	0.000223
A0A0D9R2L3	RNASEH2A	33.522	16	0.4243	0.00827
A0A0D9RMJ2	LARP6	54.763	5	0.4242	0.00423
A0A0D9RU72	RIF1	273.55	42	0.424	0.000908
A0A0D9R3W6	--	51.963	11	0.4229	9.68e-05
A0A0D9QUS0	PLD3	54.831	7	0.4226	0.0195
A0A0D9S8B1	HSPG2	468.72	169	0.4223	2.55e-05
A0A0D9R443	ERAL1	48.364	14	0.4222	0.00387
A0A0D9RYF8	TYMS	35.632	17	0.4215	0.000185
A0A0D9RRE8	FRMD6	72.075	11	0.4192	0.00153
A0A0D9RCI7	IRF2BP2	60.974	36	0.4178	0.000118
A0A0D9S729	CACHD1	136.71	8	0.411	0.0128
A0A0D9R000	AKAP1	96.975	11	0.4106	1.98e-05
A0A0D9R689	BCAT1	43.479	31	0.41	0.00128
A0A0D9R4V8	DNMT1	183.11	49	0.4089	0.00104
A0A0D9R4W3	CTSL	37.43	35	0.4067	0.000198
A0A0D9R2B8	FADS1	57.889	30	0.4041	0.00154
A0A0D9S4V6	CSNK1D	46.832	13	0.4035	0.00634
A0A0D9RFP6	OGT	116.95	96	0.403	8.21e-07
A0A0D9R9E7	HMCES	40.496	8	0.3986	0.0197
A0A0D9QUS7	C4orf3	22.149	11	0.3963	0.00185
A0A0D9QW72	POLR2I	14.523	11	0.3959	0.00322
A0A0D9S8G9	EPHA2	114.95	63	0.3959	6.11e-05
A0A0D9R200	ADGRE5	92.321	12	0.3944	0.00813
A0A0D9RBZ8	CTSD	44.752	62	0.3928	6.17e-05
A0A0D9S3L7	ATXN2	124.02	10	0.3913	0.00267
A0A0D9R749	C8orf33	28.143	8	0.3896	0.00551
A0A0D9QWM1	RBM42	47.406	30	0.3886	0.00384
A0A0D9R9L7	CPT1A	88.35	10	0.3885	0.0131
A0A0D9RRX9	--	6.6767	16	0.3877	2.3e-05
A0A0D9S5A8	NCOR2	274.44	43	0.3855	0.000725
A0A0D9SD96	--	11.638	16	0.3841	0.0467
A0A0D9RFQ7	GOLGA5	83.245	15	0.3832	0.000678
A0A0D9RVB3	CHD8	290.25	13	0.3831	0.0167
A0A0D9RWZ5	--	54.894	12	0.379	0.0117
A0A0D9S334	FTL	19.995	11	0.3789	0.0113
A0A0D9R137	--	63.531	14	0.3777	3.39e-05
A0A0D9R708	CHCHD6	26.449	8	0.376	0.0101
A0A0D9R633	GPC4	62.468	58	0.3686	5.51e-06
A0A0D9R291	--	95.257	11	0.3641	0.00733
A0A0D9RZ10	TRIM4	54.307	8	0.3639	0.000552
A0A0D9R9L3	APP	87.071	18	0.3629	0.000117
A0A0D9RUS3	TNFRSF10B	45.756	11	0.3617	0.0013
A0A0D9RBL1	ERO1B	53.534	9	0.3569	0.0342
A0A0D9R114	--	181.69	5	0.3563	0.0175
A0A0D9QXD1	FAR1	59.328	8	0.3527	0.024
A0A0D9RZ91	GALNT1	64.218	8	0.3527	0.00293
A0A0D9S9Q6	PDHA2	42.953	11	0.3526	0.00952
A0A0D9RIS0	GNL3L	52.49	8	0.3495	0.00642
A0A0D9S3V0	--	71.396	13	0.3358	0.0239
A0A0D9QYG2	--	6.0422	18	0.3297	0.000695
A0A0D9RPY5	PENK	30.844	6	0.3277	0.0123
A0A0D9SBY5	--	40.312	10	0.3246	0.0247
A0A0D9S1T1	YAP1	54.925	18	0.3197	0.00033
A0A0D9R279	DNAJB6	36.302	4	0.312	0.0363
A0A0D9RBE8	SLC4A7	106.5	22	0.311	0.000351
A0A0D9QX26	CTR9	133.61	21	0.3109	0.00216
A0A0D9QV60	STRADA	48.425	7	0.3108	0.00713
A0A0D9RNA2	DDX3X	49.525	16	0.3082	0.0234
A0A0D9RJB0	GOLIM4	82.47	49	0.3038	1.06e-05
A0A0D9RIY7	SDC2	22.18	13	0.3035	0.00579
A0A0D9SE84	MRPL41	15.435	23	0.2996	0.000529
A0A0D9RSQ0	CENPF	357.74	19	0.2952	0.0026
A0A0D9R2C9	FADS3	51.076	21	0.2925	0.00136
A0A0D9RRL6	LAMB2	195.85	24	0.2882	0.00112
A0A0D9RVU8	PAX8	48.7	8	0.2804	0.0353
A0A4W3NN68	APOE	36.019	15	0.2795	0.000369
A0A0D9QV27	--	166.54	35	0.2789	8.65e-06
A0A0D9R473	FSTL1	35.003	24	0.2782	5.82e-07
A0A0D9RAX8	GHITM	37.14	14	0.2735	0.000278
A0A0D9RLH0	ARG2	38.544	20	0.2731	0.0012
A0A0D9QXT3	--	95.28	63	0.2601	2.04e-06
A0A0D9RK88	--	260.04	14	0.2566	0.0125
A0A0D9S7N4	PPT1	34.246	24	0.252	1.89e-06
A0A0D9RRP8	CD46	42.003	17	0.249	0.00021
A0A0D9R0N2	ROBO2	133.95	17	0.2469	0.00444
A0A0D9RFR3	LGMN	49.398	13	0.2451	1.26e-05
A0A0D9RSM3	MTHFD2	37.897	34	0.2446	2.55e-05
A0A0D9S7Z5	PUM1	128.18	26	0.242	0.000185
A0A0D9RP30	RIOK2	43.484	6	0.2374	0.00966
A0A0D9RQ31	CSPG4	250.56	42	0.1946	0.000602
A0A0D9R507	GOLM1	45.901	15	0.1883	0.00427
A0A0D9RGS3	PTK7	118.44	81	0.1882	3.63e-05
A0A0D9RRG1	CEMIP	154.86	23	0.1835	3.45e-05
A0A0D9SA13	RTL8C	13.171	11	0.1813	0.00158
A0A0D9REC3	--	54.926	26	0.1757	0.000425
A0A0D9RDG4	UHRF1	90.479	25	0.1701	1.77e-05
A0A0D9S2A8	TENM3	270.78	18	0.1607	0.000307
A0A0D9QYJ2	CRELD2	38.266	10	0.1564	0.000531
A0A0D9RGR6	RELN	384.21	52	0.1219	0.00106
A0A0D9R169	TMBIM6	26.518	6	0.1138	0.00547
A0A0D9RSY8	LAMA4	202.06	105	0.1133	7.03e-06
A0A0D9SB46	--	15.546	17	0.1023	6.55e-05
A0A0D9S1E6	PLAUR	36.635	16	0.0878	3.07e-05
A0A0D9RP10	SEMA7A	57.176	14	0.0747	2.49e-05
A0A0D9RT19	--	14.726	22	0.069	4.62e-05
A0A0D9R4H0	COL6A2	108.38	20	0.0668	6.59e-05
A0A0D9SDQ0	VGF	67.269	23	0.0631	0.00134
